# Supplementary material for: Stability and toxicity of tris-tolyl bismuth(v) dicarboxylates and their biological activity towards Leishmania major
Source: Royal Society of Chemistry journal article supplement (doi:10.1039/c5dt03335g), 2015-01-01
Supplement: c5dt03335g1.pdf [file c5dt03335g1.pdf]

Supplementary Information

**Stability and Toxicity of Tris-tolyl Bi(V) Dicarboxylates and  
their Biological Activity against *Leishmania major***

Yih Ching Ong, Victoria L. Blair, Lukasz Kedzierski, Kellie L. Tuck and Philip C. Andrews

**Contents**

1. Experimental details for Compounds **13 – 31**
2. <sup>1</sup>H NMR Spectra of Complexes **1 – 3, 5 – 11, 13 – 29**
3. Biological graphs for Compounds **25 – 29** and **32**
4. Solid state structures for Compounds **6, 8, 9, 19, 22, 25 – 28** and **31**
5. Crystallographic summary of **6, 8, 9, 19, 22, 25 – 28** and **31**

## 1. Experimental details for Compounds 13 – 31

General synthetic procedure (GP): Stoichiometric amounts of BiAr<sub>3</sub> and benzoic acid (1:2) were each dissolved in 5 ml of warm solvent and combined. This was followed by one equivalent of 30% H<sub>2</sub>O<sub>2</sub>. The mixture was stirred for 10 minutes and filtered. Crystals were subsequently obtained on allowing the filtrate to stand at room temperature overnight.

Grignard reagents were synthesized under Schlenk conditions in Et<sub>2</sub>O by the reaction of stoichiometric ratios of Mg turnings with 2-bromotoluene, 3-bromotoluene and 4-bromotoluene respectively. The resulting Grignard reagent was standardized (reference) and reacted with BiCl<sub>3</sub> to obtain the BiAr<sub>3</sub> product.

Compounds **4**, **12** and **32** are Bi(*o*-Tol)<sub>3</sub>, Bi(*p*-Tol)<sub>3</sub>, Bi(*m*-Tol)<sub>3</sub> respectively, these are known compounds and hence will not be discussed in the supplementary.

### Synthesis of *tris-o*-tolylbismuth bis(3,5-dimethylbenzoate), **13**

Bi(*o*-Tol)<sub>3</sub> (0.200 g, 0.41 mmol), 3,5-dimethylbenzoic acid (0.124 g, 0.83 mmol) and 100 µL of 30 % H<sub>2</sub>O<sub>2</sub> were reacted in warm diethyl ether according to GP1. Yield: 49.0 % (0.157 g); MP: 120-123 °C; <sup>1</sup>H NMR (400 MHz, (CDCl<sub>3</sub>, 25 °C): δ = 7.75 (4H, s, *o*-CH), 7.57 (3H, dd, *J* = 7.5 Hz, 1.2 Hz, Tol *o*-CH), 7.30 (3H, td, *J* = 7.4 Hz, 1.3 Hz, Tol *m*-CH), 7.30 (2H, s, *p*-CH), 7.08 (3H, td, *J* = 7.3 Hz, 0.76, Tol *m*-CH), 2.46 (9H, s, Tol CH<sub>3</sub>), 2.39 (12H, s, CH<sub>3</sub>); <sup>13</sup>C{<sup>1</sup>H} (150 MHz, CDCl<sub>3</sub>, 25 °C): δ = 172.4 (COO), 143.8 (CH<sub>ar</sub>), 138.8 (CH<sub>ar</sub>), 138.3 (CH<sub>ar</sub>), 135.5 (CH<sub>ar</sub>), 130.0 (CH<sub>ar</sub>), 129.5 (CH<sub>ar</sub>), 128.8 (CH<sub>ar</sub>), 128.4 (CH<sub>ar</sub>), 128.0 (CH<sub>ar</sub>), 26.5 (CH<sub>3</sub>), 21.3 (CH<sub>3</sub>); MS ESI<sup>+</sup> 209.0 [Bi], 391.0 [Bi(*o*-Tol)]<sup>+</sup>, 631.1 [Bi(*o*-Tol)<sub>3</sub>L]<sup>+</sup>; ESI<sup>-</sup> 149 [L]<sup>-</sup>; IR 3036 (w), 2914 (w), 1618 (w), 1588 (m), 1527 (m), 1438 (m), 1378 (sh), 1328 (s), 1252 (s), 1204 (sh), 1116 (m), 1037 (m), 986 (sh), 919 (m), 865 (sh), 784 (sh), 747 (s), 676 (sh); Elemental analysis [C<sub>39</sub>H<sub>39</sub>BiO<sub>4</sub>·5C<sub>6</sub>H<sub>5</sub>CH<sub>3</sub>] (1240.58) Calculated C 71.60 H 6.41 Found C 71.21 H 6.60.

### Synthesis of *tris-o*-tolylbismuth bis(3,5-dihydroxybenzoate), **14**

Bi(*o*-Tol)<sub>3</sub> (0.200 g, 0.41 mmol), 3,5-dihydroxybenzoic acid (0.128 g, 0.83 mmol) and 100 µL 30 % H<sub>2</sub>O<sub>2</sub> were reacted in warm diethyl ether and THF according to GP1. Yield: 59.4 % (0.192 g); MP: 120 °C (decomp.); <sup>1</sup>H NMR (400 MHz, (CD<sub>3</sub>)<sub>2</sub>SO, 25 °C): δ = 9.28 (4H, s, OH), 8.33 (3H, d, *J* = 7.8 Hz, Tol CH), 7.61 (6H, m, Tol CH), 7.50 (3H, t, *J* = 7.5, Tol CH), 6.57 (4H, d, *J* = 2.1, CH), 6.25 (2H, t, *J* = 2.1, ligand CH), 2.58 (9H, s, Tol CH<sub>3</sub>); <sup>13</sup>C{<sup>1</sup>H} (100 MHz, (CD<sub>3</sub>)<sub>2</sub>SO, 25 °C): δ = 169.6 (COO), 162.4 (BiC), 158.0 (COH), 141.3 (CCH<sub>3</sub>), 134.0 (CCOO), 133.4 (CH<sub>ar</sub>), 131.0 (CH<sub>ar</sub>), 128.6 (CH<sub>ar</sub>), 107.4 (CH<sub>ar</sub>), 105.5 (CH<sub>ar</sub>), 22.8 (CH<sub>3</sub>); MS 209.0 [Bi], 391.0 [Bi(*o*-Tol)<sub>2</sub>]<sup>+</sup>, 635.1 [Bi(*o*-Tol)<sub>3</sub>L]<sup>+</sup>, 725.1 [BiL]<sup>2+</sup>; ESI<sup>-</sup> 153.0 [L]<sup>-</sup>, 787.1 [Bi(*o*-Tol)<sub>3</sub>L<sub>2</sub> - H]<sup>-</sup>; IR 3200 (br), 1558 (m), 1448 (m), 1336 (st), 1268 (st), 1203 (sh), 1153 (st), 995 (sh), 950 (m), 847 (m), 769 (sh), 743 (s), 674 (s); Elemental analysis [C<sub>35</sub>H<sub>31</sub>BiO<sub>8</sub>·2H<sub>2</sub>O] (824.64) Calculated C 50.98 H 4.28 Found C 50.81 H 4.58.

### Synthesis of *tris-o*-tolylbismuth bis(2-methoxybenzoate), **15**

Bi(*o*-Tol)<sub>3</sub> (0.200 g, 0.41 mmol), 2-methoxybenzoic acid (0.126 g, 0.83 mmol) and 100 µL 30 % H<sub>2</sub>O<sub>2</sub> were reacted in warm diethyl ether according to GP1. Yield: 34.5 % (0.111 g); MP: 136-137 °C; <sup>1</sup>H NMR (400 MHz, (CD<sub>3</sub>)<sub>2</sub>SO, 25 °C): δ = 8.34 (3H, d, *J* = 7.9 Hz, Tol CH), 7.59 (6H, m, Tol CH), 7.48 (3H, t, *J* = 7.5 Hz, Tol CH), 7.29 (2H, m, CH), 7.14 (2H, dd, *J* = 7.7 Hz, 1.7 Hz, CH), 6.94 (2H, d, *J* = 7.9 Hz, CH), 6.81 (2H, td, *J* = 7.5 Hz, 0.8 Hz, CH), 3.64 (6H, s, CH<sub>3</sub>), 2.60 (9H, s, Tol CH<sub>3</sub>); <sup>13</sup>C{<sup>1</sup>H} (150 MHz, CDCl<sub>3</sub>,

25 °C):  $\delta$  = 171.2 (COO), 163.0 (BiC), 158.1 (COCH<sub>3</sub>), 134.9 (CH<sub>ar</sub>), 133.2 (CH<sub>ar</sub>), 131.0 (CH<sub>ar</sub>), 130.8 (CH<sub>ar</sub>), 130.7 (CH<sub>ar</sub>), 128.3 (CH<sub>ar</sub>), 125.6 (CH<sub>ar</sub>), 120.0 (CCOO), 111.9 (CH<sub>ar</sub>), 55.8 (OCH<sub>3</sub>), 23.8 (CH<sub>3</sub>); MS ESI<sup>+</sup> 209.0 [Bi], 391.0 [Bi(*o*-Tol)<sub>2</sub>], 633.1 [Bi(*o*-Tol)<sub>3</sub>L]<sup>+</sup>; ESI<sup>-</sup> 151.1 [L]<sup>-</sup>, 693.2 [Bi(*m*-Tol)<sub>2</sub>L<sub>2</sub>]<sup>-</sup>; IR 2941 (w), 2833 (w), 2113 (w), 1593 (m), 1483 (w), 1458 (m), 1435 (m), 1375 (w), 1327 (s), 1297 (m), 1266 (sh), 1245 (sh), 1206(sh), 1173 (sh), 1161 (sh), 1139 (sh), 1047 (m), 1096 (sh), 1017 (m), 991 (sh), 845 (sh), 784 (sh), 743 (s), 705 (sh); Elemental analysis [C<sub>37</sub>H<sub>35</sub>BiO<sub>6</sub>·H<sub>2</sub>O] (802.68) Calculated C 55.37, H 4.65; Found 55.26, H 4.48.

#### Synthesis of *tris-o*-tolylbismuth bis(5-chlorosalicylate), **16**

Bi(*o*-Tol)<sub>3</sub> (0.200 g, 0.41 mmol), 5-chlorosalicylic acid (0.143 g, 0.83 mmol) and 100  $\mu$ L 30 % H<sub>2</sub>O<sub>2</sub> were reacted in warm diethyl ether according to GP. Yield: 28.6 % (0.097 g); MP: 152-153 °C; <sup>1</sup>H NMR (400 MHz, CDCl<sub>3</sub>, 25 °C):  $\delta$  = 11.69 (2H, s, OH), 8.37 (3H, dd, *J* = 7.9 Hz, 1.2 Hz, Tol CH), 7.56 (8H, m, Tol CH + ligand CH), 7.48 (3H, td, *J* = 7.4 Hz, 1.2 Hz, Tol CH), 7.21 (2H, dd, *J* = 8.7 Hz, 2.7 Hz, CH), 6.76 (2H, d, *J* = 8.8, CH), 2.66 (9H, s, Tol CH<sub>3</sub>); <sup>13</sup>C{<sup>1</sup>H} (100 MHz, (CD<sub>3</sub>)<sub>2</sub>SO, 25 °C):  $\delta$  = 172.6 (COO), 161.9 (COH), 160.2 (BiC), 142.2 (BiC), 142.2 (CCH<sub>3</sub>), 134.7 (CH<sub>ar</sub>), 134.0 (CH<sub>ar</sub>), 131.8 (CH<sub>ar</sub>), 130.1 (CH<sub>ar</sub>), 129.1 (CH<sub>ar</sub>), 123.0 (*i*-Car), 118.5 (CH<sub>ar</sub>), 117.0 (CH<sub>ar</sub>), 23.8 (CH<sub>3</sub>); MS ESI<sup>+</sup> 209.0 [Bi], 391.0 [Bi(*o*-Tol)<sub>2</sub>]<sup>+</sup>, 653.1 [Bi(*o*-Tol)<sub>3</sub>L]<sup>+</sup>; ESI<sup>-</sup> 171.0 [L]<sup>-</sup>; IR 2967 (br), 1629 (sh), 1579 (sh), 1465 (sh), 1407 (sh), 1365 (sh), 1342 (sh), 1287 (sh), 1232 (sh), 1205 (sh), 1104 (sh), 995 (sh), 896 (w), 809 (sh), 744 (sh), 713 (sh); Elemental analysis [C<sub>35</sub>H<sub>29</sub>BiCl<sub>2</sub>O<sub>6</sub>] (825.49) Calculated C 50.93 H 3.54 Found C 50.72 H 3.59.

#### Synthesis of *tris-m*-tolylbismuth bis(5-bromosalicylate), **17**

Bi(*o*-Tol)<sub>3</sub> (0.200 g, 0.41 mmol), 5-bromosalicylic acid (0.180 g, 0.83 mmol) and 100  $\mu$ L 30 % H<sub>2</sub>O<sub>2</sub> were reacted in warm diethyl ether according to GP. Yield: 20.0 % (0.075 g); MP: 152-154 °C; <sup>1</sup>H NMR (400 MHz, CDCl<sub>3</sub>, 25 °C):  $\delta$  = 11.7 (2H, s, OH), 8.36 (3H, dd, *J* = 8.0 Hz, 1.0 Hz, *o*-CH<sub>ar</sub>), 7.70 (2H, d, *J* = 2.4 Hz, (O<sub>2</sub>C)CCHC(Br)), 7.59 (3H, d, *J* = 7.6 Hz, *m*-CH<sub>ar</sub>), 7.59 (3H, d, *J* = 7.6 Hz, *m*-CH<sub>ar</sub>), 7.55 (3H, t, *J* = 7.6 Hz, *p*-CH<sub>ar</sub>), 7.48 (3H, t, *J* = 7.4 Hz, 1.1 Hz, *m*-CH<sub>ar</sub>), 7.34 (2H, dd, *J* = 8.9 Hz, 2.5 Hz, *p*-CH<sub>ar</sub>), 6.71 (2H, d, *J* = 8.7 Hz, *m*-CH<sub>ar</sub>), 2.66 (9H, s, CH<sub>3</sub>); <sup>13</sup>C{<sup>1</sup>H} (100 MHz, CDCl<sub>3</sub>, 25 °C):  $\delta$  = 172.4 (COO), 161.8 (COH), 160.6 (BiC), 142.1 (CCH<sub>3</sub>), 136.8 (CH<sub>ar</sub>), 134.7 (CH<sub>ar</sub>), 134.0 (CH<sub>ar</sub>), 131.8 (CH<sub>ar</sub>), 129.1 (CH<sub>ar</sub>), 118.9 (CH<sub>ar</sub>), 117.5 (*i*-Car), 110.0 (CH<sub>ar</sub>), 23.9 (CH<sub>3</sub>); MS 208.9 [Bi]; 391.0 [Bi(*m*-Tol)<sub>2</sub>]<sup>+</sup>; 697 [Bi(*m*-Tol)<sub>3</sub>LH + H]<sup>+</sup>; ESI<sup>-</sup> 216.9 [L]<sup>-</sup>; IR 3047 (w), 2973 (w), 2863 (w), 1626 (sh), 1583 (sh), 1561 (sh), 1464 (sh), 1335 (sh), 1287 (sh), 1236 (sh), 1098 (sh), 1035 (w), 1001 (sh), 898 (w), 879 (w), 806 (sh), 742 (sh), 695 (sh); Elemental analysis [C<sub>35</sub>H<sub>29</sub>BiBr<sub>2</sub>O<sub>6</sub>] (914.40) Calculated C 45.97 H 3.20 Found C 45.81 H 3.34.

#### Synthesis of *tris-o*-tolylbismuth bis(2-{[3-(Trifluoromethyl)phenyl]amino}benzoate), **18**

Bi(*o*-Tol)<sub>3</sub> (0.200 g, 0.41 mmol), flufenamic acid (0.233 g, 0.83 mmol) and 100  $\mu$ L 30 % H<sub>2</sub>O<sub>2</sub> were reacted in warm diethyl ether according to GP. Yield: 14.3 % (0.064 g); MP: 134-136 °C; <sup>1</sup>H NMR (400 MHz, (CD<sub>3</sub>)<sub>2</sub>SO, 25 °C):  $\delta$  = 9.47 (2H, s, NH), 8.41 (3H, d, *J* = 8.2 Hz, CH<sub>ar</sub>), 7.70 (2H, dd, *J* = 8.0 Hz, 1.6 Hz, CH<sub>ar</sub>), 7.59 (6H, m, CH<sub>ar</sub>), 7.46 (5H, m, CH<sub>ar</sub>), 7.31 (2H, t, *J* = 7.6 Hz, CH<sub>ar</sub>), 7.25 (4H, t, *J* = 7.8 Hz, CH<sub>ar</sub>), 7.17 (4H, m, CH<sub>ar</sub>), 6.78 (2H, t, *J* = 7.5 Hz, CH<sub>ar</sub>), 2.56 (9H, s, CH<sub>3</sub>); <sup>13</sup>C{<sup>1</sup>H} (100 MHz, (CD<sub>3</sub>)<sub>2</sub>SO, 25 °C):  $\delta$  = 171.3 (COO), 162.2 (BiC), 144.6 (C(NH)), 144.1 (C(NH)), 142.3 (CF<sub>3</sub>), 141.4 (C(CH<sub>3</sub>)), 138.8 (CH<sub>ar</sub>), 134.2 (CH<sub>ar</sub>), 133.7 (CH<sub>ar</sub>), 132.8 (CH<sub>ar</sub>), 132.1 (CH<sub>ar</sub>), 131.3 (CH<sub>ar</sub>), 130.5 (CH<sub>ar</sub>), 130.0 (CCF<sub>3</sub>), 128.9 (CH<sub>ar</sub>), 122.7 (CH<sub>ar</sub>), 119.0 (CH<sub>ar</sub>), 117.9 (CCOO), 115.2 (CH<sub>ar</sub>), 22.9 (CH<sub>3</sub>); MS ESI<sup>+</sup> 209.0 [Bi], 391.0 [Bi(*o*-Tol)<sub>2</sub>]<sup>+</sup>, 762.1 [Bi(*o*-Tol)<sub>3</sub>L]<sup>+</sup>; ESI<sup>-</sup> 280.1 [L]<sup>-</sup>; IR 3258 (w), 1607 (m), 1579 (sh), 1502 (sh),

1460 (m), 1442 (m), 1414 (w), 1332 (sh), 1265 (sh), 1262 (sh), 1235 (m), 1208 (w), 1235 (sh), 1165 (sh), 1118 (sh), 1092 (m), 1069 (sh), 1044 (w), 995 (m), 928 (w), 898 (w), 855 (w), 796 (sh), 743 (sh), 697 (sh), 665 (sh); Elemental analysis [C<sub>49</sub>H<sub>39</sub>BiF<sub>6</sub>N<sub>2</sub>O<sub>4</sub>] (1042.83) Calculated C 56.44 H 3.77 N 2.69 Found C 56.48 H 3.73 N 2.62.

#### Synthesis of *tris-m*-tolylbismuth bis(5-chlorosalicylate), **19**

Bi(*m*-Tol)<sub>3</sub> (0.200 g, 0.41 mmol), 5-chlorosalicylic acid (0.143 g, 0.83 mmol) and 100 µL 30 % H<sub>2</sub>O<sub>2</sub> were reacted in warm diethyl ether according to GP. Yield: 26.6 % (0.090 g); MP: 182-185 °C; <sup>1</sup>H NMR (600 MHz, CDCl<sub>3</sub>, 25 °C): δ = 8.00 (3H, s, Tol *o*-CH), 7.98 (3H, d, <sup>3</sup>J = 8.2 Hz, Tol *o*-CH), 7.75 (2H, d, *J* = 2.6 Hz, *o*-CH), 7.56 (3H, t, *J* = 7.8 Hz, Tol *m*-CH), 7.33 (3H, d, *J* = 7.6 Hz, Tol *p*-CH), 7.26 (2H, dd, *J* = 8.7 Hz, 2.7 Hz, *p*-CH), 6.81 (2H, d, *J* = 8.8 Hz, *m*-CH), 2.43 (9H, s, Tol CH<sub>3</sub>); <sup>13</sup>C{<sup>1</sup>H} (150 MHz, (CD<sub>3</sub>)<sub>2</sub>SO, 25 °C): δ = 173.8 (COO), 160.1 (BiC), 158.5 (COH), 142.3 (CCl), 134.4 (CH<sub>ar</sub>), 132.6 (CH<sub>ar</sub>), 131.2 (CH<sub>ar</sub>), 130.5 (CH<sub>ar</sub>), 123.2 (CCH<sub>3</sub>), 22.2 (CH<sub>3</sub>); MS ESI<sup>+</sup> 209.0 [Bi], 391.2 [Bi(*m*-Tol)<sub>2</sub>]<sup>+</sup>, 653.2 [Bi(*m*-Tol)<sub>3</sub>L]<sup>+</sup>; ESI<sup>-</sup> 127.0 [L-COO]<sup>-</sup>, 170.9 [L]<sup>-</sup>; IR 2853 (br), 1626 (sh), 1582 (sh), 1561 (sh), 1465 (sh), 1405 (sh), 1379 (sh), 1352 (sh), 1288 (sh), 1232 (sh), 1210 (sh), 1066 (m), 980 (sh), 900 (m), 867 (w), 814 (sh), 772 (sh), 713 (sh), 674 (sh); Elemental analysis [C<sub>35</sub>H<sub>29</sub>BiCl<sub>2</sub>O<sub>6</sub>] (825.49) Calculated C 50.93 H 3.54 Found C 51.40 H 3.96.

#### Synthesis of *tris-m*-tolylbismuth bis(5-bromosalicylate), **20**

Bi(*m*-Tol)<sub>3</sub> (0.200 g, 0.41 mmol), 5-bromosalicylic acid (0.180 g, 0.83 mmol) and 100 µL 30 % H<sub>2</sub>O<sub>2</sub> were reacted in warm diethyl ether according to GP. Yield: 48.0 % (0.180 g); MP: 190-192 °C; <sup>1</sup>H NMR (600 MHz, CDCl<sub>3</sub>, 25 °C): δ = 8.00 (3H, s, Tol *o*-CH), 7.98 (3H, d, <sup>3</sup>J = 8.2 Hz, Tol *o*-CH), 7.90 (2H, d, *J* = 2.4 Hz, *o*-CH), 7.56 (3H, t, *J* = 7.7 Hz, *o*-CH), 7.39 (2H, dd, *J* = 8.6 Hz, 2.4 Hz, Tol *m*-CH), 7.33 (3H, d, <sup>3</sup>J = 7.5 Hz, Tol *p*-CH), 6.76 (2H, d, *J* = 8.8 Hz, *m*-CH), 2.43 (9H, s, Tol CH<sub>3</sub>); <sup>13</sup>C{<sup>1</sup>H} (150 MHz, CDCl<sub>3</sub>, 25 °C): δ = 173.7 (COO), 160.6 (COH), 158.4 (BiC), 142.3 (CCH<sub>3</sub>), 137.2 (CH<sub>ar</sub>), 134.3 (CH<sub>ar</sub>), 133.5 (CH<sub>ar</sub>), 132.5 (CH<sub>ar</sub>), 131.5 (CH<sub>ar</sub>), 131.1 (CH<sub>ar</sub>), 119.0 (CH<sub>ar</sub>), 117.1 (CBr), 110.2 (CCOO), 22.2 (CH<sub>3</sub>); MS ESI<sup>+</sup> 209.0 [Bi], 391.2 [Bi(*m*-Tol)<sub>2</sub>]<sup>+</sup>, 699.1 [Bi(*m*-Tol)<sub>3</sub>L]<sup>+</sup>; ESI<sup>-</sup> 170.9 [L-COO]<sup>-</sup>, 214.9 [L]<sup>-</sup>; IR 2856 (br), 1624 (sh), 1584 (sh), 1560 (m), 1466 (sh), 1399 (sh), 1377 (sh), 1346 (sh), 1290 (sh), 1244 (sh), 1209 (m), 1099 (w), 1065 (w), 999 (w), 980 (sh), 900 (w), 812 (sh), 768 (sh), 698 (sh), 673 (sh); Elemental analysis [C<sub>35</sub>H<sub>29</sub>BiBr<sub>2</sub>O<sub>6</sub>·(C<sub>2</sub>H<sub>5</sub>)<sub>2</sub>O] (988.52) Calculated C 47.39 H 3.98 Found C 46.96 H 3.74.

#### Synthesis of *tris-m*-tolylbismuth bis(2', 4'-difluoro-4-hydroxybiphenyl-3-carboxylate), **21**

Bi(*m*-Tol)<sub>3</sub> (0.2 g, 0.41 mmol), Diflunisal (0.21 g, 0.83 mmol) and 100 µL 30 % H<sub>2</sub>O<sub>2</sub> were reacted in warm diethyl ether according to GP. Yield: 56.2 % (0.226 g); MP: 190 °C (decomp); <sup>1</sup>H NMR (400 MHz, (CD<sub>3</sub>)<sub>2</sub>SO, 25 °C): δ = 8.05 (3H, s, Tol *o*-CH), 7.98 (3H, d, *J* = 7.7 Hz, Tol *o*-CH), 7.90 (2H, s, *o*-CH), 7.86 (3H, t, *J* = 7.7 Hz, Tol *m*-CH), 7.54 (4H, m, CH), 7.44 (3H, d, *J* = 7.7 Hz, Tol *p*-CH), 7.33 (2H, td, *J* = 10.3 Hz, 2.7 Hz, CH), 7.16 (2H, td, *J* = 8.4 Hz, 2.5 Hz, CH), 6.94 (2H, d, *J* = 8.6 Hz, CH), 2.37 (9H, s, CH<sub>3</sub>); <sup>13</sup>C{<sup>1</sup>H} (100 MHz, (CD<sub>3</sub>)<sub>2</sub>SO, 25 °C): δ = 161.2 (BiC), 158.7 (CF), 142.1 (CF), 134.5 (CH<sub>ar</sub>), 132.4 (CH<sub>ar</sub>), 131.4 (CH<sub>ar</sub>), 117.3 (CH<sub>ar</sub>), 111.7 (CH<sub>ar</sub>), 111.5 (CH<sub>ar</sub>), 115.2 (COH), 104.4 (CH<sub>ar</sub>), 22.1 (CH<sub>3</sub>); MS ESI<sup>+</sup> 209.0 [Bi], 391.2 [Bi(*m*-Tol)<sub>2</sub>]<sup>+</sup>, 731.2 [Bi(*m*-Tol)<sub>3</sub>L]<sup>+</sup>; ESI<sup>-</sup> 205.0 [L-COO]<sup>-</sup>, 249.0 [L]<sup>-</sup>; IR 3019 (br), 1630 (m), 1591 (m), 1561 (sh), 1508 (sh), 1475 (sh), 1427 (m), 1409 (m), 1475 (sh), 1381 (s), 1359 (sh), 1246 (s), 1220 (sh), 1136 (sh), 1094 (sh), 1034 (w), 998 (w), 965 (sh), 892 (sh), 869 (sh), 843 (sh), 814 (sh), 765 (sh), 735 (m), 718 (sh), 670 (sh); Elemental Analysis [C<sub>47</sub>H<sub>35</sub>BiF<sub>4</sub>O<sub>6</sub>] (980.77) Calculated C 57.56 H 3.60 Found C 57.58 H 3.77.

#### Synthesis of *tris-m*-tolylbismuth bis(2-[(3-chloro-2-methylphenyl)amino]benzoate), **22**

Bi(*m*-Tol)<sub>3</sub> (0.400 g, 0.82 mmol), tolfenamic acid (0.434 g, 1.64 mmol) and 100  $\mu$ L 30 % H<sub>2</sub>O<sub>2</sub> were reacted in warm diethyl ether according to GP. Yield: 59.6 % (0.491 g); MP: 130-134 °C; <sup>1</sup>H NMR (400 MHz, CDCl<sub>3</sub>, 25 °C):  $\delta$  = 9.49 (2H, s, NH), 8.00 (3H, s, Tol *o*-CH), 7.95 (3H, d, <sup>3</sup>J = 8.0 Hz, Tol *o*-CH), 7.89 (2H, dd, J = 8.0 Hz, 1.6 Hz, *o*-CH), 7.37 (3H, t, J = 7.7 Hz, Tol *m*-CH), 7.16 (3H, d, J = 7.4 Hz, Tol *p*-CH), 7.07 (6H, m, CH), 6.97 (2H, t, J = 7.9 Hz, CH), 6.73 (2H, dd, J = 8.6 Hz, 0.7 Hz, CH), 6.58 (2H, td, J = 7.5 Hz, 1.0 Hz, CH), 2.24 (9H, s, Tol CH<sub>3</sub>), 2.13 (6H, s, CH<sub>3</sub>); <sup>13</sup>C{<sup>1</sup>H} (150 MHz, CDCl<sub>3</sub>, 25 °C):  $\delta$  = 174.3 (COO), 160.7 (BiC), 147.6 (*i*-C<sub>ar</sub>), 141.5 (*i*-C<sub>ar</sub>), 135.5 (*i*-C<sub>ar</sub>), 134.4 (CH<sub>ar</sub>), 133.0 (CH<sub>ar</sub>), 132.9 (CH<sub>ar</sub>), 131.8 (CH<sub>ar</sub>), 131.0 (CH<sub>ar</sub>), 130.9 (*i*-C<sub>ar</sub>), 126.8 (CH<sub>ar</sub>), 124.7 (CH<sub>ar</sub>), 121.9 (CH<sub>ar</sub>), 116.9 (CH<sub>ar</sub>), 115.6 (CCOO), 113.6 (CH<sub>ar</sub>), 22.0 (CH<sub>3</sub>), 15.0 (CH<sub>3</sub>); MS ESI<sup>+</sup> 209.0 [Bi], 391.2 [Bi(*m*-Tol)<sub>2</sub>]<sup>+</sup>, 742.2 [Bi(*m*-Tol)<sub>3</sub>L]<sup>+</sup>; ESI<sup>-</sup> 216.0 [L - COO]<sup>-</sup>, 260.0 [L]<sup>-</sup>; IR 3241 (br), 3051 (w), 1654 (w), 1612 (sh), 1581 (sh), 1499 (sh), 1458 (m), 1438 (m), 1359 (s), 1159 (m), 1042 (w), 1012 (m), 979 (sh), 908 (m), 849 (sh), 810 (sh), 774 (sh), 747 (sh), 702 (m), 670 (sh); Elemental analysis [C<sub>49</sub>H<sub>45</sub>BiCl<sub>2</sub>N<sub>2</sub>O<sub>4</sub>·(C<sub>2</sub>H<sub>5</sub>)<sub>2</sub>O] (1077.90) Calculated C 59.06 H 4.96 N 2.60 Found C 59.66 H 4.50 N 3.17

#### Synthesis of *tris-p*-tolylbismuth bis(3,5-dimethylbenzoate), **23**

Bi(*p*-Tol)<sub>3</sub> (0.200 g, 0.41 mmol), 3,5-dimethylbenzoic acid (0.125 g, 0.83 mmol) and 100  $\mu$ L 30 % H<sub>2</sub>O<sub>2</sub> were reacted in warm diethyl ether according to GP. Yield: 33.4 % (0.107 g), MP: 166 °C (decomp.); <sup>1</sup>H NMR (400 MHz, (CD<sub>3</sub>)<sub>2</sub>SO, 25 °C):  $\delta$  = 8.05 (6H, d, J = 8.2 Hz, Tol *o*-CH), 7.51 (6H, d, J = 8.1 Hz, Tol *m*-CH), 7.46 (4H, s, *o*-CH), 7.12 (2H, s, *p*-CH), 2.32 (9H, s, Tol CH<sub>3</sub>), 2.26 (12H, s, CH<sub>3</sub>); <sup>13</sup>C{<sup>1</sup>H} (100 MHz, (CD<sub>3</sub>)<sub>2</sub>SO, 25 °C):  $\delta$  = 171.8 (COO), 157.5 (BiC), 141.0 (CCH<sub>3</sub>), 137.4 (CCH<sub>3</sub>), 133.4 (CCOO), 133.2 (BiCCH), 132.3 (Bi(OOC)CCH), 132.0 ((OOC)CCHC(CH<sub>3</sub>)), 127.4 (C(CH<sub>3</sub>)CHC(CH<sub>3</sub>)), 20.8 (CH<sub>3</sub>), 20.7 (CH<sub>3</sub>); MS ESI<sup>+</sup> 208.8 [Bi], 527.1 [Bi(*p*-Tol)L + DMSO]<sup>+</sup>, 631.1 [Bi(*p*-Tol)<sub>3</sub>L]<sup>+</sup>; ESI<sup>-</sup> 149.1 [L]<sup>-</sup>, 391.1 [Bi(*p*-Tol)<sub>2</sub>]<sup>+</sup>; IR 3054 (w), 2916 (w), 2863 (w), 1577 (sh), 1560 (m), 1482 (m), 1482 (m), 1444 (m), 1381 (sh), 1344 (s), 1309 (sh), 1206 (sh), 1185 (sh), 1115 (w), 1039 (w), 999 (sh), 944 (w), 921 (w), 868 (sh), 783 (sh), 768 (sh), 677 (sh); Elemental analysis [C<sub>39</sub>H<sub>39</sub>BiO<sub>4</sub>·H<sub>2</sub>O] (798.73) Calculated C 58.62 H 5.17 Found C 58.28, H 5.08.

#### Synthesis of *tris-p*-tolylbismuth bis(3,5-dihydroxybenzoate), **24**

Bi(*p*-Tol)<sub>3</sub> (0.200 g, 0.41 mmol), 3,5-dihydroxybenzoic acid (0.128 g, 0.83 mmol) and 100  $\mu$ L 30 % H<sub>2</sub>O<sub>2</sub> were reacted in warm diethyl ether according to GP. Yield: 0.196 g (0.196 g); MP: 155 °C (decomp.); <sup>1</sup>H NMR (400 MHz, (CD<sub>3</sub>)<sub>2</sub>SO, 25 °C):  $\delta$  = 9.39 (4H, s, OH), 8.00 (6H, d, J = 8.3 Hz, Tol *o*-CH), 7.51 (6H, d, J = 8.7 Hz, Tol *m*-CH), 6.71 (4H, d, J = 2.2, *o*-CH), 6.30 (2H, t, J = 2.3, *p*-CH), 2.34 (9H, s, Tol CH<sub>3</sub>); <sup>13</sup>C{<sup>1</sup>H} (100 MHz, (CD<sub>3</sub>)<sub>2</sub>SO, 25 °C):  $\delta$  = 171.7 (COO), 158.1 (BiC), 157.4 (*i*-C<sub>ar</sub>), 141.1 (*i*-C<sub>ar</sub>), 134.3 (CH<sub>ar</sub>), 133.1 (CH<sub>ar</sub>), 131.9 (CH<sub>ar</sub>), 107.7 (CH<sub>ar</sub>), 106.1 (CH<sub>ar</sub>), 20.9 (CH<sub>ar</sub>); MS ESI<sup>+</sup> 208.9 [Bi], 391.0 [Bi(*p*-Tol)<sub>2</sub>]<sup>+</sup>, [Bi(*p*-Tol)<sub>3</sub>L]<sup>+</sup>, ESI<sup>-</sup> 153.0 [L]<sup>-</sup>; IR 3237 (br), 1543 (s), 1482 (m), 1446 (w), 1343 (s), 1294 (m), 1204 (w), 1184 (sh), 1151 (s), 1099 (w), 995 (sh), 953 (m), 858 (m), 776 (s), 677 (m); Elemental analysis [C<sub>35</sub>H<sub>31</sub>BiO<sub>8</sub>] (788.61) Calculated C 53.31 H 3.96 Found C 53.66 H 4.24.

#### Synthesis of *tris-p*-tolylbismuth bis(2-methoxybenzoate), **25**

Bi(*p*-Tol)<sub>3</sub> (0.200 g, 0.41 mmol), 2-methoxybenzoic acid (0.126 g, 0.83 mmol) and 100  $\mu$ L 30 % H<sub>2</sub>O<sub>2</sub> were reacted in warm diethyl ether according to GP. Yield: 68.7 % (0.221 g); MP: 153-156 °C; <sup>1</sup>H NMR (400 MHz, (CD<sub>3</sub>)<sub>2</sub>SO, 25 °C):  $\delta$  = 8.09 (6H, dt, J = 8.2 Hz, 2.3 Hz, Tol *o*-CH), 7.52 (6H, dd, J = 8.5 Hz, 0.6

Hz, Tol *m*-CH), 7.39 (4H, m, CH), 7.02 (2H, d, *J* = 8.2 Hz, CH), 6.09 (2H, t, *J* = 7.35 Hz, CH), 3.77 (6H, s, OCH<sub>3</sub>), 2.35 (9H, s, Tol CH<sub>3</sub>); <sup>13</sup>C{<sup>1</sup>H} (100 MHz, (CD<sub>3</sub>)<sub>2</sub>SO, 25 °C): δ = 171.9 (COO), 157.8 (BiC), 156.8 (COCH<sub>3</sub>), 141.1 (CH<sub>ar</sub>), 133.4 (CH<sub>ar</sub>), 132.0 (CH<sub>ar</sub>), 130.3 (CH<sub>ar</sub>), 123.7 (CH<sub>ar</sub>), 119.9 (CCOO), 112.5 (CH<sub>ar</sub>), 55.8 (OCH<sub>3</sub>), 20.8 (CH<sub>3</sub>); MS ESI<sup>+</sup> 209.0 [Bi], 391.0 [Bi(p-Tol)<sub>2</sub>]<sup>+</sup>, 633.1 [Bi(p-Tol)<sub>3</sub>L]<sup>+</sup>; 151.1 [L]<sup>-</sup>; IR 2953 (br), 2832(w), 1686 (w), 1586 (sh), 1560 (sh), 1482 (sh), 1463 (sh), 1389 (sh), 1343 (sh), 1288 (m), 1245 (m), 1143 (sh), 1097 (m), 1048 (sh), 1017 (sh), 999 (sh), 956 (w), 852 (w), 789 (w), 755 (sh), 660 (sh); Elemental analysis [C<sub>37</sub>H<sub>35</sub>BiO<sub>6</sub>·H<sub>2</sub>O] (802.23) Calculated C 55.37 H4.65 Found C 55.77 H 4.51.

#### Synthesis of *tris*-*p*-tolylbismuth bis(2-ethoxybenzoate), **26**

Bi(p-Tol)<sub>3</sub> (0.200 g, 0.41 mmol), 2-ethoxybenzoic acid (0.125 g, 0.83 mmol) and 100 μL 30 % H<sub>2</sub>O<sub>2</sub> were reacted in warm diethyl ether according to GP. Yield: 42.9 % (0.143 g); MP: 163-165 °C; <sup>1</sup>H NMR (400 MHz, (CD<sub>3</sub>)<sub>2</sub>SO, 25 °C): δ = 8.13 (6H, d, *J* = 8.1 Hz, Tol *o*-CH), 7.50 (6H, d, *J* = 8.0 Hz, Tol *m*-CH), 7.36 (4H, m, CH), 7.00 (2H, d, *J* = 8.0 Hz, CH), 6.88 (2H, t, *J* = 8.0 Hz, CH), 4.00 (4H, q, *J* = 6.7 Hz, OCH<sub>2</sub>CH<sub>3</sub>), 2.35 (9H, s, Tol CH<sub>3</sub>), 1.31 (6H, t, *J* = 7.0 Hz, OCH<sub>2</sub>CH<sub>3</sub>); <sup>13</sup>C{<sup>1</sup>H} (100 MHz, (CD<sub>3</sub>)<sub>2</sub>SO, 25 °C): δ = 172.3 (COO), 157.3 (BiC), 157.0 (i-Car), 140.9 (CCH<sub>3</sub>), 133.3 (CH<sub>ar</sub>), 131.8 (CH<sub>ar</sub>), 130.3 (CH<sub>ar</sub>), 123.9 (CH<sub>ar</sub>), 119.9 (CH<sub>ar</sub>), 113.4 (CH<sub>ar</sub>), 64.9 (OCH<sub>2</sub>CH<sub>3</sub>), 20.8 (CH<sub>3</sub>), 15.2 (OCH<sub>2</sub>CH<sub>3</sub>); MS ESI<sup>+</sup> 208.9 [Bi], 647.1 [Bi(p-Tol)<sub>3</sub>L]<sup>+</sup>, [Bi(p-Tol)<sub>3</sub>L<sub>2</sub> + Na]<sup>+</sup>; ESI<sup>-</sup> [L]<sup>-</sup>, [Bi(p-Tol)<sub>2</sub>]; IR 3055 (w), 2982 (w), 2918 (w), 2872 (w), 1583 (sh), 1546 (m), 1484 (sh), 1385 (m), 1352 (s), 1292 (m), 1268 (sh), 1235 (m), 1163 (sh), 1146 (sh), 1110 (m), 999 (sh), 955 (w), 922 (m), 851 (sh), 809 (sh), 790 (sh), 754 (sh), 703 (sh), 667 (sh); Elemental analysis [C<sub>39</sub>H<sub>39</sub>BiO<sub>6</sub>·H<sub>2</sub>O] (830.27) Calculated C 56.39 H 4.97 Found C 56.89 H 4.87.

#### Synthesis of *tris*-*p*-tolylbismuth bis(4-nitrobenzoate), **27**

Bi(p-Tol)<sub>3</sub> (0.200 g, 0.41 mmol), 4-nitrobenzoic acid (0.138 g, 0.83 mmol) and 100 μL 30 % H<sub>2</sub>O<sub>2</sub> were reacted in warm diethyl ether according to GP. Yield: 43.8 %, (0.146 g); MP: 94-98 °C; <sup>1</sup>H NMR (600 MHz, (CD<sub>3</sub>)<sub>2</sub>SO, 25 °C): δ = 8.22 (4H, d, *J* = 8.8 Hz, *o*-CH), 8.07 (10H, m, *m*-CH + Tol *o*-CH), 7.55 (6H, dd, *J* = 8.8 Hz, 0.5 Hz, Tol *m*-CH), 2.34 (9H, s, CH<sub>3</sub>); <sup>13</sup>C{<sup>1</sup>H} (150 MHz, (CD<sub>3</sub>)<sub>2</sub>SO, 25 °C): δ = 169.4 (COO), 155.6 (BiC), 149.5 (CNO<sub>2</sub>), 141.6 (CCH<sub>3</sub>), 138.2 (CH<sub>ar</sub>), 133.4 (CH<sub>ar</sub>), 132.3 (CH<sub>ar</sub>), 130.8 (CH<sub>ar</sub>), 123.5 (CCOO), 20.9 (CH<sub>3</sub>); MS ESI<sup>+</sup> 208.9 [Bi], 648.1 [Bi(p-Tol)<sub>3</sub>L]<sup>+</sup>, ESI<sup>-</sup> 166.0 [L]<sup>-</sup>; IR 3052 (w), 1624 (w), 1583 (m), 1520 (sh), 1484 (w), 1406 (w), 1388 (w), 1331 (st), 1309 (st), 1205 (w), 1184 (sh), 1164 (sh), 1129 (sh), 1102 (sh), 1040 (w), 1012 (sh), 996 (sh), 876 (sh), 831 (sh), 792 (sh), 722 (sh); Elemental analysis [C<sub>35</sub>H<sub>29</sub>BiN<sub>2</sub>O<sub>8</sub>] (814.60) Calculated C 51.61 H 3.59 N 3.44 Found C 51.28 H 3.59 N 3.36

#### Synthesis of *tris*-*p*-tolylbismuth bis(5-chlorosalicylate), **28**

Bi(p-Tol)<sub>3</sub> (0.200 g, 0.41 mmol), 5-chlorosalicylic acid (0.143 g, 0.83 mmol) and 100 μL 30 % H<sub>2</sub>O<sub>2</sub> were reacted in warm diethyl ether according to GP. Yield: 80.4 % (0.272 g); MP: 201-203 °C; <sup>1</sup>H NMR (600 MHz, CDCl<sub>3</sub>, 25 °C): δ = 11.59 (2H, s, OH), 8.07 (6H, d, *J* = 8.4 Hz, *o*-CH<sub>ar</sub>), 7.73 (2H, d, *J* = 2.3 Hz, *o*-CH<sub>ar</sub>), 7.45 (6H, d, *J* = 8.2 Hz, *m*-CH<sub>ar</sub>), 7.25 (2H, dd, CH<sub>ar</sub>, *J* = 8.8 Hz, 2.4 Hz, CH<sub>ar</sub>), 6.80 (2H, d, CH<sub>ar</sub>, *J* = 8.7 Hz, 2.41, CH<sub>ar</sub>), 2.41 (9H, s, CH<sub>3</sub>); <sup>13</sup>C{<sup>1</sup>H} (150 MHz, (CD<sub>3</sub>)<sub>2</sub>SO, 25 °C): δ = 173.9 (COO), 160.1 (COH), 155.7 (BiC), 142.2 (CCH<sub>3</sub>), 134.4 (CH<sub>ar</sub>), 134.0 (CH<sub>ar</sub>), 132.5 (CH<sub>ar</sub>), 130.5 (CH<sub>ar</sub>), 123.1 (CCOO), 118.5 (CCl), 116.4 (CH<sub>ar</sub>), 21.6 (CH<sub>3</sub>); MS ESI<sup>+</sup> 209.0 [Bi], 653.0 [Bi(p-Tol)<sub>3</sub>L]<sup>+</sup>, ESI<sup>-</sup> 171.0 [L]<sup>-</sup>; IR 3059 (w), 2919 (w), 2861 (w), 1629 (sh), 1586 (sh), 1586 (sh), 1558 (sh), 1467 (sh); Elemental analysis [C<sub>35</sub>H<sub>29</sub>BiCl<sub>2</sub>O<sub>6</sub>] (825.49) Calculated C 50.93 H 3.54 Found C 50.83 H 3.65.

### Synthesis of *tris-p*-tolylbismuth bis(5-bromosalicylate), **29**

Bi(*p*-Tol)<sub>3</sub> (0.200 g, 0.41 mmol), 5-bromosalicylic acid (0.180 g, 0.83 mmol) and 100 µL 30 % H<sub>2</sub>O<sub>2</sub> were reacted in warm diethyl ether according to GP. Yield: 93.3 % (0.350 g); MP: 201–203 °C; <sup>1</sup>H NMR (400 MHz, CDCl<sub>3</sub>, 25 °C): δ = 11.61 (2H, s, OH), 8.07 (6H, d, *J* = 8.2 Hz, *o*-CH<sub>ar</sub>), 7.87 (2H, d, *J* = 2.1 Hz, CH<sub>ar</sub>), 7.45 (6H, d, *J* = 8.0 Hz, *m*-CH<sub>ar</sub>), 7.38 (2H, dd, *J* = 8.9 Hz, 2.1 Hz, CH<sub>ar</sub>), 6.75 (2H, d, *J* = 8.7 Hz, CH<sub>ar</sub>), 2.41 (9H, s, CH<sub>3</sub>); <sup>13</sup>C{<sup>1</sup>H} (100 MHz, CDCl<sub>3</sub>, 25 °C): δ = 173.8 (COO), 160.5 (COH), 155.7 (BiC), 142.2 (CCH<sub>3</sub>), 137.2 (CH<sub>ar</sub>), 134.0 (CH<sub>ar</sub>), 133.4 (CH<sub>ar</sub>), 132.5 (CH<sub>ar</sub>), 119.0 (CH<sub>ar</sub>), 117.0 (CBr), 110.2 (CCOO), 21.6 (CH<sub>3</sub>); MS ESI<sup>+</sup> 209.0 [Bi], 698.9 [Bi(*p*-Tol)<sub>3</sub>L]<sup>+</sup>; ESI<sup>-</sup> 216.9 [L]<sup>-</sup>; IR 3057 (w), 1625 (sh), 1586 (sh), 1554 (sh), 1554 (sh), 1465 (sh), 1465 (sh), 1399 (sh), 1399 (s), 1376 (s), 1345 (s), 1240 (sh), 1186 (sh), 1099 (m), 1052 (w), 997 (sh), 814 (sh), 793 (sh), 738 (w), 698 (sh); Elemental analysis [C<sub>35</sub>H<sub>29</sub>BiBr<sub>2</sub>O<sub>6</sub>] (912.01) Calculated C 45.97 H 3.20 Found C 46.05 H 3.31.

### Synthesis of *tris-p*-tolylbismuth bis(2', 4'-difluoro-4-hydroxybiphenyl-3-carboxylate), **30**

Bi(*p*-Tol)<sub>3</sub> (0.200 g, 0.41 mmol), Diflunisal (0.210 g, 0.83 mmol) and 100 µL 30 % H<sub>2</sub>O<sub>2</sub> were reacted in warm diethyl ether according to GP. Yield: 49.7 % (0.200 g); MP: 211 °C (decomp); <sup>1</sup>H NMR (400 MHz, CDCl<sub>3</sub>, 25 °C): δ = 11.60 (2H, s, OH), 8.00 (6H, d, *J* = 8.3 Hz, *o*-CH<sub>ar</sub>), 7.82 (2H, s, CH<sub>ar</sub>), 7.34 (8H, m, *m*-CH<sub>ar</sub> + CH<sub>ar</sub>), 7.22 (2H, m, CH<sub>ar</sub>), 6.80 (6H, m, CH<sub>ar</sub>), 2.29 (9H, s, CH<sub>3</sub>); <sup>13</sup>C{<sup>1</sup>H} (100 MHz, CDCl<sub>3</sub>, 25 °C): δ = 174.6 (COO), 161.2 (BiC), 158.5 (CF), 156.1 (CF), 142.0 (CCH<sub>3</sub>), 135.0 (CCOO), 134.0 (*o*-CH<sub>ar</sub>), 132.4 (*m*-CH<sub>ar</sub>), 131.5 (CH<sub>ar</sub>), 131.2 (CH<sub>ar</sub>), 125.4 (*i*-C<sub>ar</sub>), 117.3 (CH<sub>ar</sub>), 115.5 (COH), 111.7 (CH<sub>ar</sub>), 111.5 (CH<sub>ar</sub>), 104.5 (CH<sub>ar</sub>), 21.6 (CH<sub>3</sub>); MS ESI<sup>+</sup> 208.9 [Bi], 731.0 [Bi(*p*-Tol)<sub>3</sub>L]<sup>+</sup>; ESI<sup>-</sup> 249.0 [L]<sup>-</sup>; IR 2868 (w), 1629 (sh), 1529 (w), 1561 (sh), 1508 (w), 1478 (sh), 1431 (sh), 1380 (s), 1366 (s), 1296 (sh), 1244 (s), 1202 (sh), 1186 (sh), 1138 (sh), 1104 (sh), 1033 (w), 996 (sh), 966 (sh), 891 (sh), 853 (sh), 812 (w), 792 (sh), 731 (sh), 714 (sh), 663 (sh); Elemental Analysis [C<sub>47</sub>H<sub>35</sub>BiF<sub>4</sub>O<sub>6</sub>] (980.77) Calculated C 57.56 H 3.60 Found C 57.61 H 3.68

### Synthesis of *tris-p*-tolylbismuth bis(2-[(3-chloro-2-methylphenyl)amino]benzoate), **31**

Bi(*p*-Tol)<sub>3</sub> (0.200 g, 0.41 mmol), Tolfenamic acid (0.217 g, 0.83 mmol) and 100 µL 30 % H<sub>2</sub>O<sub>2</sub> were reacted in warm diethyl ether according to GP. Yield: 55.4 % (0.228 g); MP: 175–177 °C; <sup>1</sup>H NMR (400 MHz, CDCl<sub>3</sub>, 25 °C): δ = 9.59 (2H, s, NH), 8.15 (6H, d, *o*-CH<sub>ar</sub>), 7.98 (2H, d, *J* = 7.9 Hz, CH<sub>ar</sub>), 7.37 (6H, d, *J* = 7.9 Hz, *m*-CH<sub>ar</sub>), 7.21 (2H, d, *J* = 7.8 Hz, CH<sub>ar</sub>), 7.18 (2H, t, *J* = 7.7 Hz, CH<sub>ar</sub>), 7.14 (2H, d, *J* = 7.8 Hz, CH<sub>ar</sub>), 7.08 (2H, t, *J* = 7.8 Hz, CH<sub>ar</sub>), 6.84 (2H, d, *J* = 8.1 Hz, CH<sub>ar</sub>), 6.67 (2H, t, *J* = 7.4 Hz, CH<sub>ar</sub>), 2.37 (9H, s, CH<sub>3</sub>), 2.23 (6H, s, CH<sub>3</sub>); <sup>13</sup>C{<sup>1</sup>H} (100 MHz, CDCl<sub>3</sub>, 25 °C): δ = 174.3 (COO), 157.7 (BiC), 147.6 (*i*-C<sub>ar</sub>), 147.6 (*i*-C<sub>ar</sub>), 141.6 (*i*-C<sub>ar</sub>), 141.3 (*i*-C<sub>ar</sub>), 135.5 (*i*-C<sub>ar</sub>), 133.9 (CH<sub>ar</sub>), 133.8 (CH<sub>ar</sub>), 133.0 (CH<sub>ar</sub>), 132.3 (CH<sub>ar</sub>), 131.9 (CH<sub>ar</sub>), 130.7 (*i*-C<sub>ar</sub>), 126.7 (CH<sub>ar</sub>), 124.6 (CH<sub>ar</sub>), 121.8 (CH<sub>ar</sub>), 116.9 (CH<sub>ar</sub>), 115.6 (CCOO), 113.5 (CH<sub>ar</sub>), 21.5 (CH<sub>3</sub>), 15.0 (CH<sub>3</sub>); MS 209.0 [Bi], 742.2 [Bi(*p*-Tol)<sub>3</sub>L]<sup>+</sup>; ESI<sup>-</sup> 260.1 [L]<sup>-</sup>; IR 3234(w), 1614 (sh), 1582 (sh), 1555 (sh), 1509 (m), 1458 (m), 1419 (w), 1359 (s), 1318 (w), 1267 (s), 1205 (s), 1183 (w), 1150 (m), 1041 (s), 1011 (sh), 997 (sh), 909 (sh), 848 (sh), 793 (sh), 768 (sh), 744 (sh), 698 (sh), 669 (sh); Elemental analysis [C<sub>49</sub>H<sub>45</sub>BiCl<sub>2</sub>N<sub>2</sub>O<sub>4</sub>·(C<sub>2</sub>H<sub>5</sub>)<sub>2</sub>O] (1077.90) Calculated C 59.06 H 4.96 N 2.60 Found C 58.76 H 4.47 N 2.67.

## 2. <sup>1</sup>H NMR Spectra of Complexes **1 – 3**, **5 – 11**, **13 – 29**

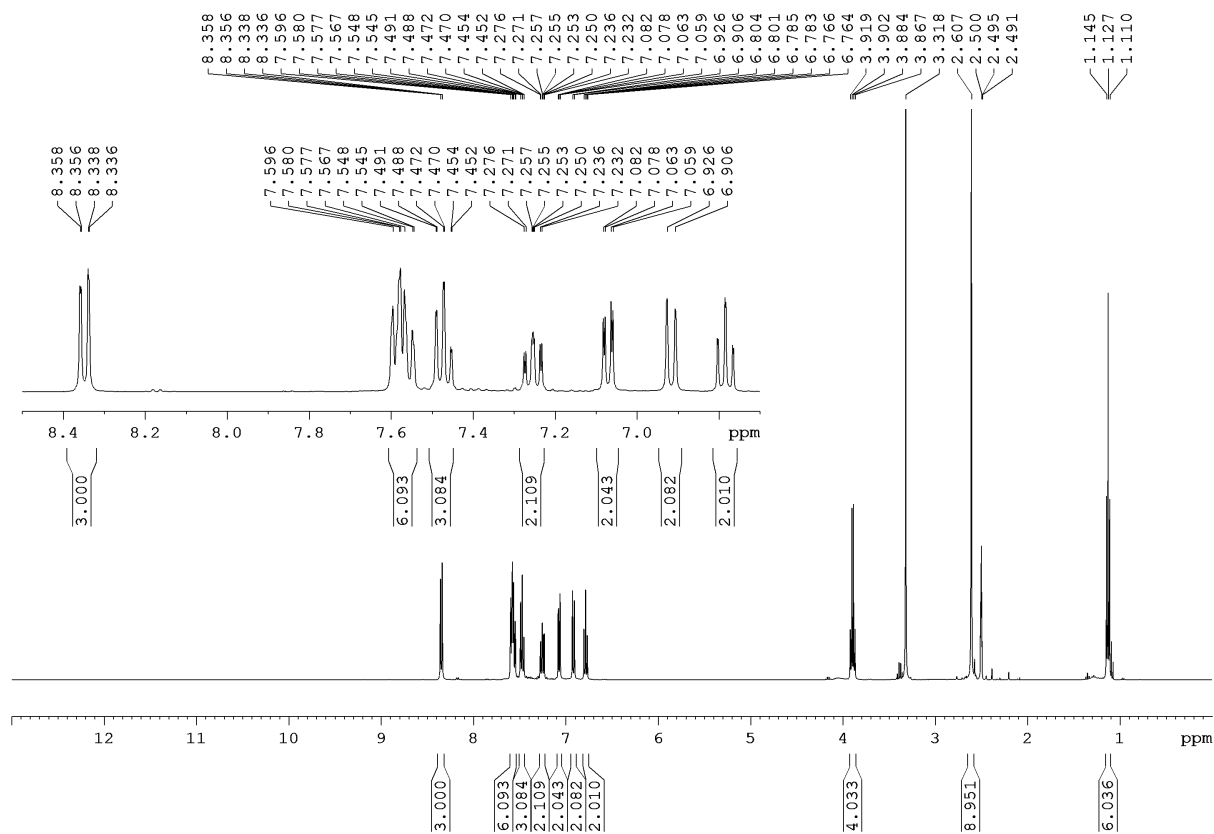

**Figure S1** <sup>1</sup>H NMR of tri-*o*-tolylbismuth bis(2-ethoxybenzoate), **1** in (CD<sub>3</sub>)<sub>2</sub>SO at 25 °C, 400 MHz

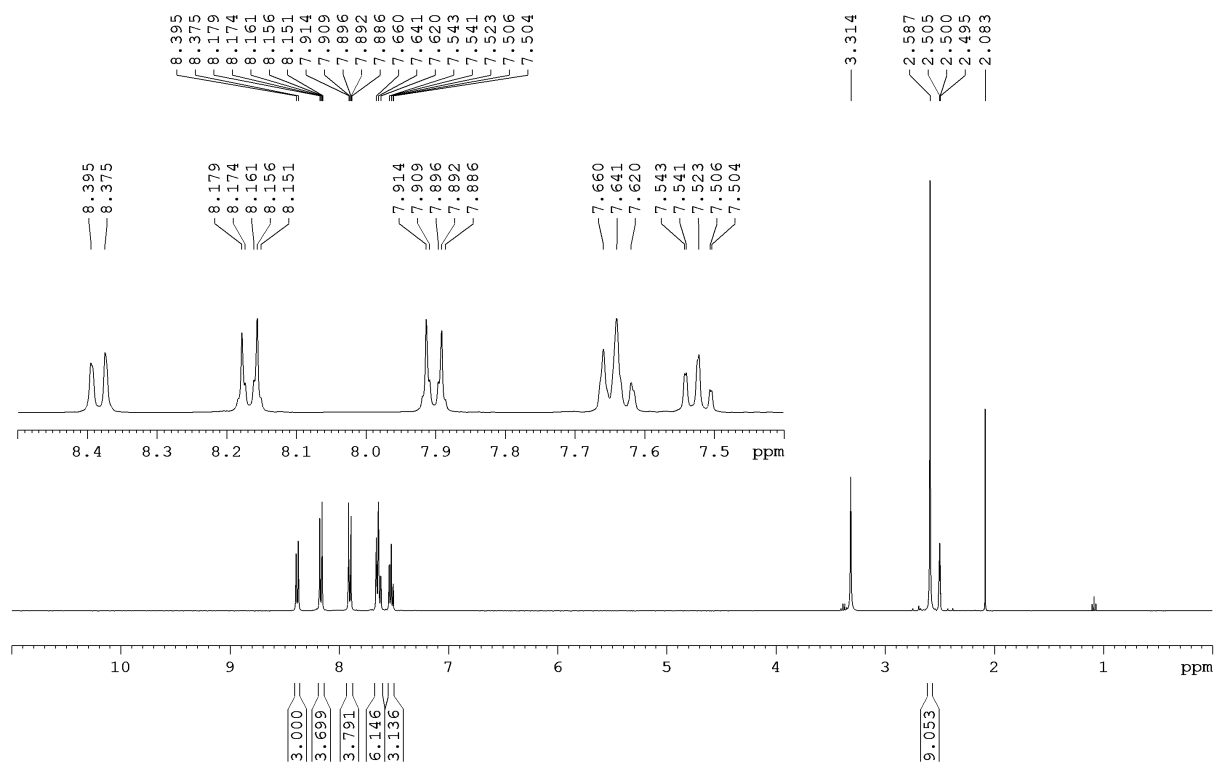

**Figure S2** <sup>1</sup>H NMR of tri-*o*-tolylbismuth bis(4-nitrobenzoate), **2** in (CD<sub>3</sub>)<sub>2</sub>SO at 25 °C, 400 MHz.

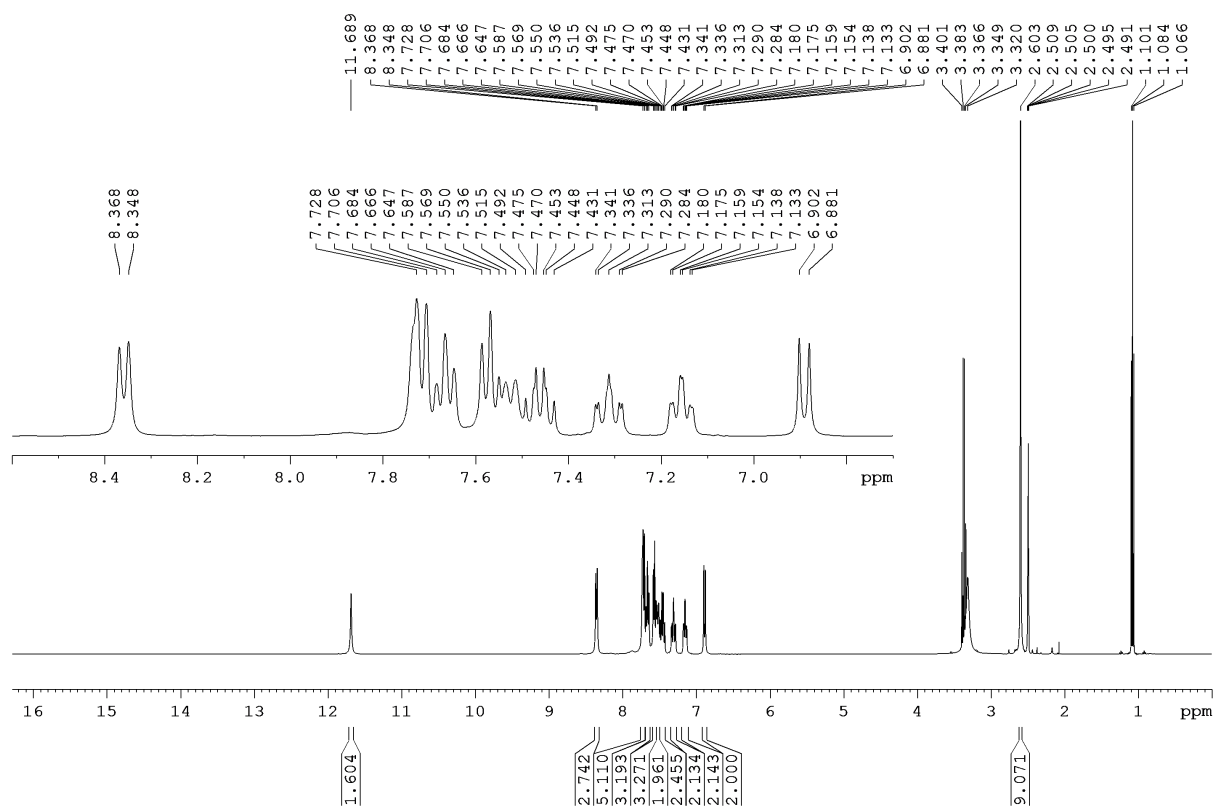

**Figure S3** <sup>1</sup>H NMR of tri-*o*-tolylbismuth bis(2',4'-difluoro-4-hydroxybiphenyl-3-carboxylate), **3** in (CD<sub>3</sub>)<sub>2</sub>SO at 25 °C, 400 MHz.

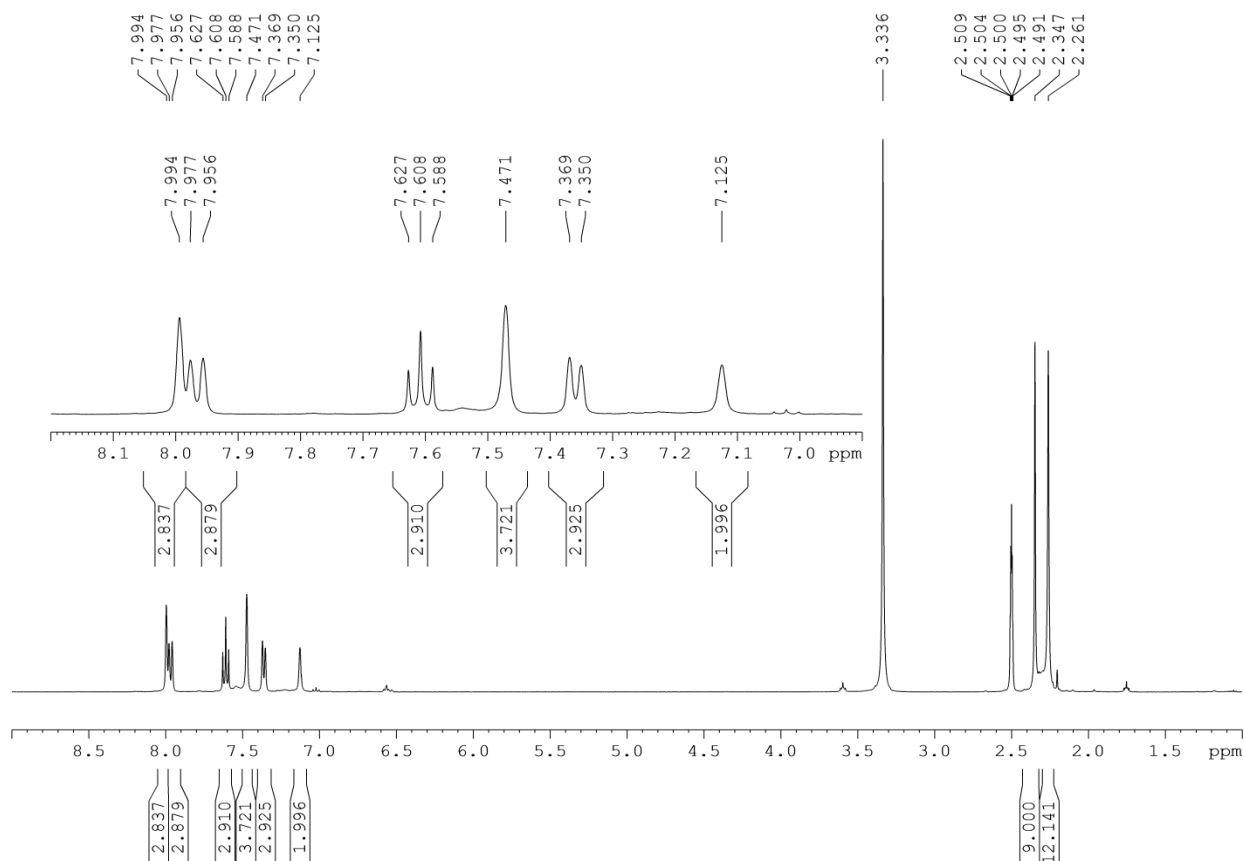

**Figure S4** <sup>1</sup>H NMR of tri-*m*-tolylbismuth bis(3,5-dimethylbenzoate), **5** in (CD<sub>3</sub>)<sub>2</sub>SO at 25 °C, 400 MHz.

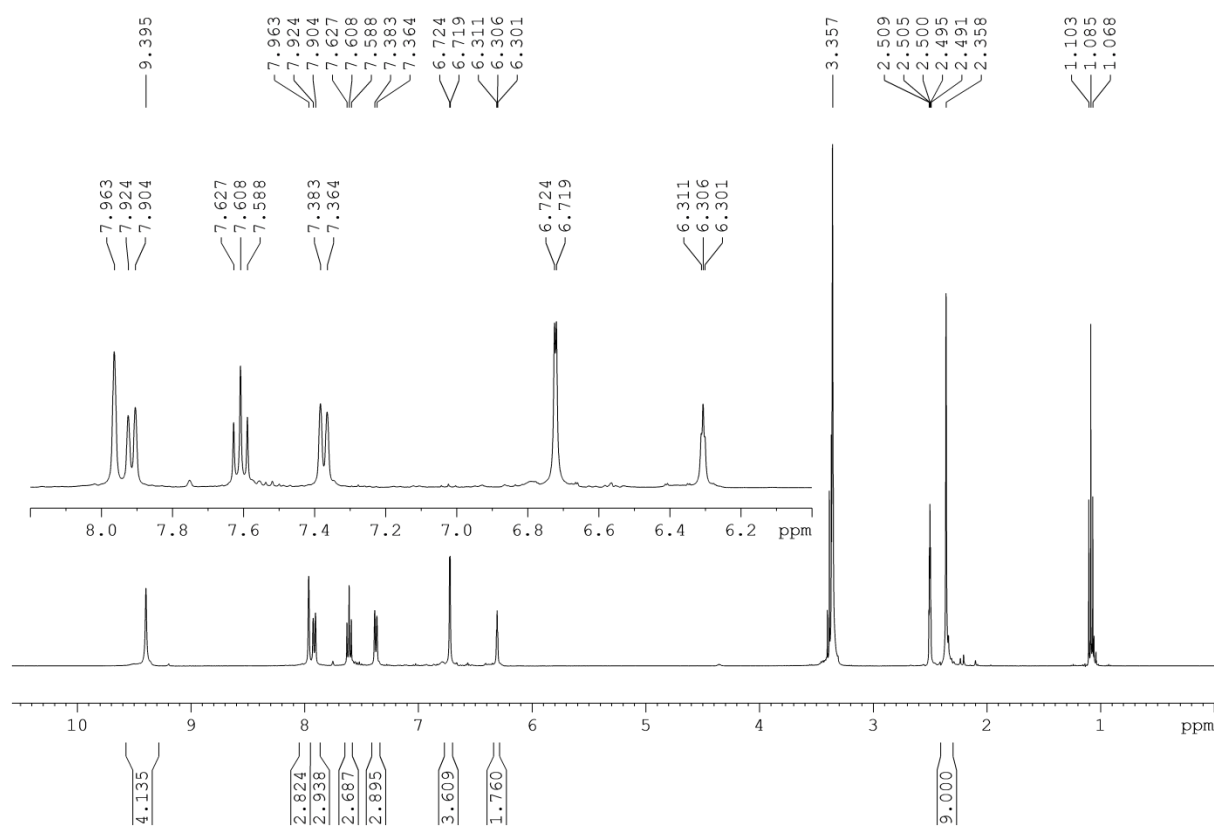

**Figure S5** <sup>1</sup>H NMR of tri-*m*-tolylbismuth bis(3,5-dihydroxybenzoate), **6** in (CD<sub>3</sub>)<sub>2</sub>SO at 25 °C, 400 MHz.

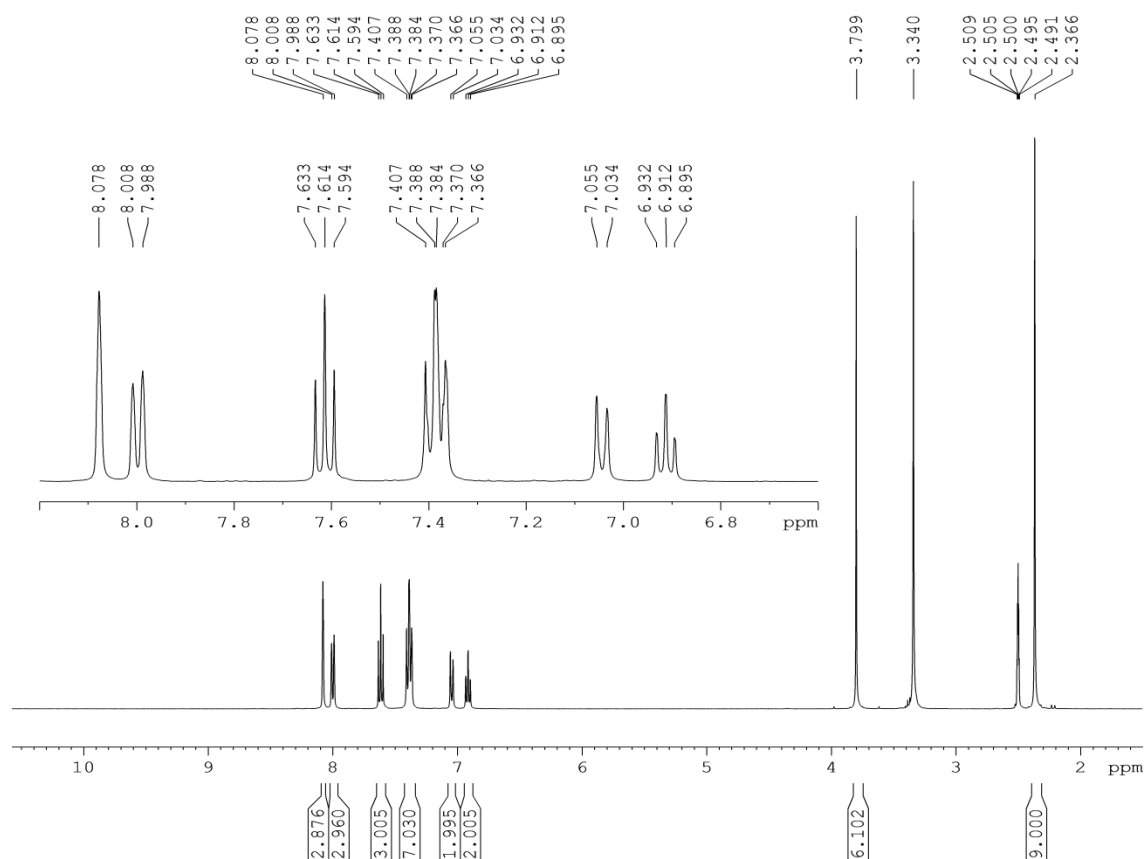

**Figure S6** <sup>1</sup>H NMR of tri-*m*-tolylbismuth bis(2-methoxybenzoate), **7** in (CD<sub>3</sub>)<sub>2</sub>SO at 25 °C, 400 MHz.

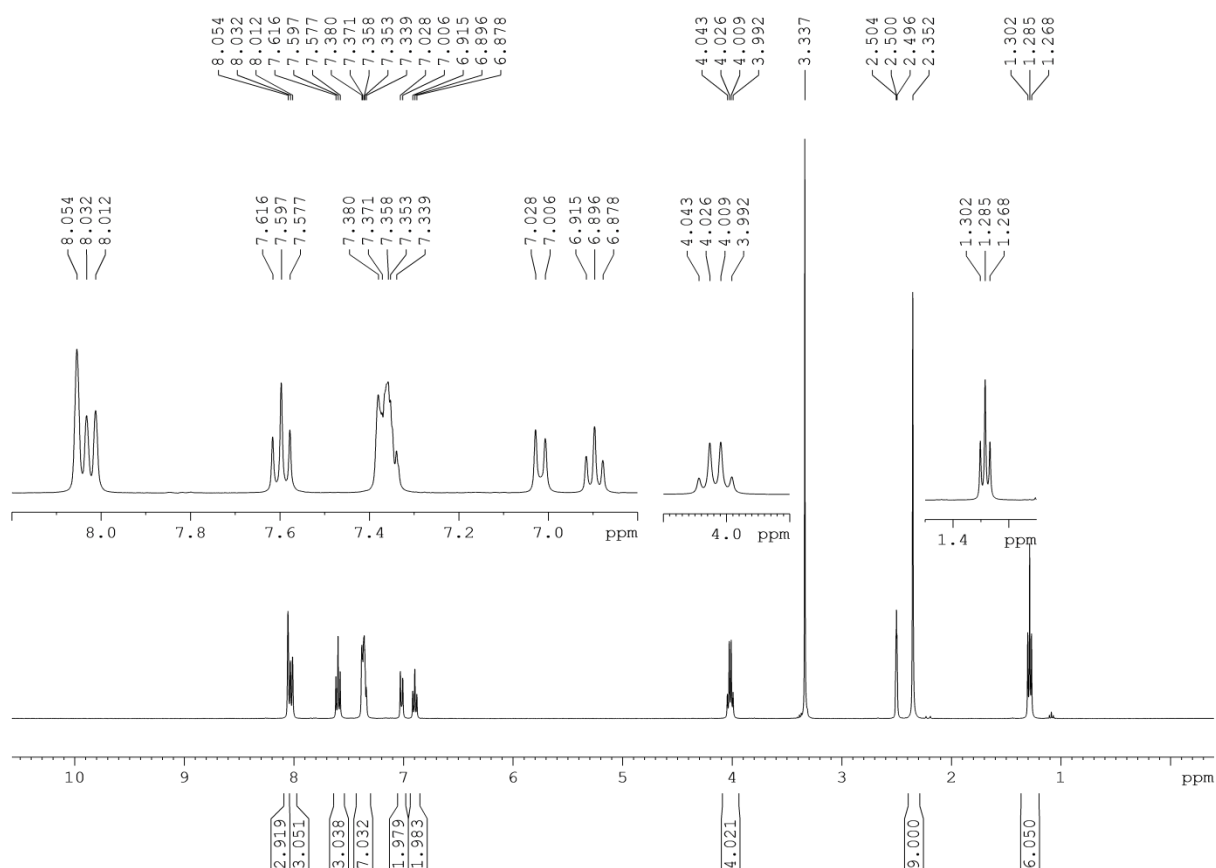

**Figure S7** <sup>1</sup>H NMR of tri-*m*-tolylbismuth bis(2-ethoxybenzoate), **8** in (CD<sub>3</sub>)<sub>2</sub>SO at 25 °C, 400 MHz.

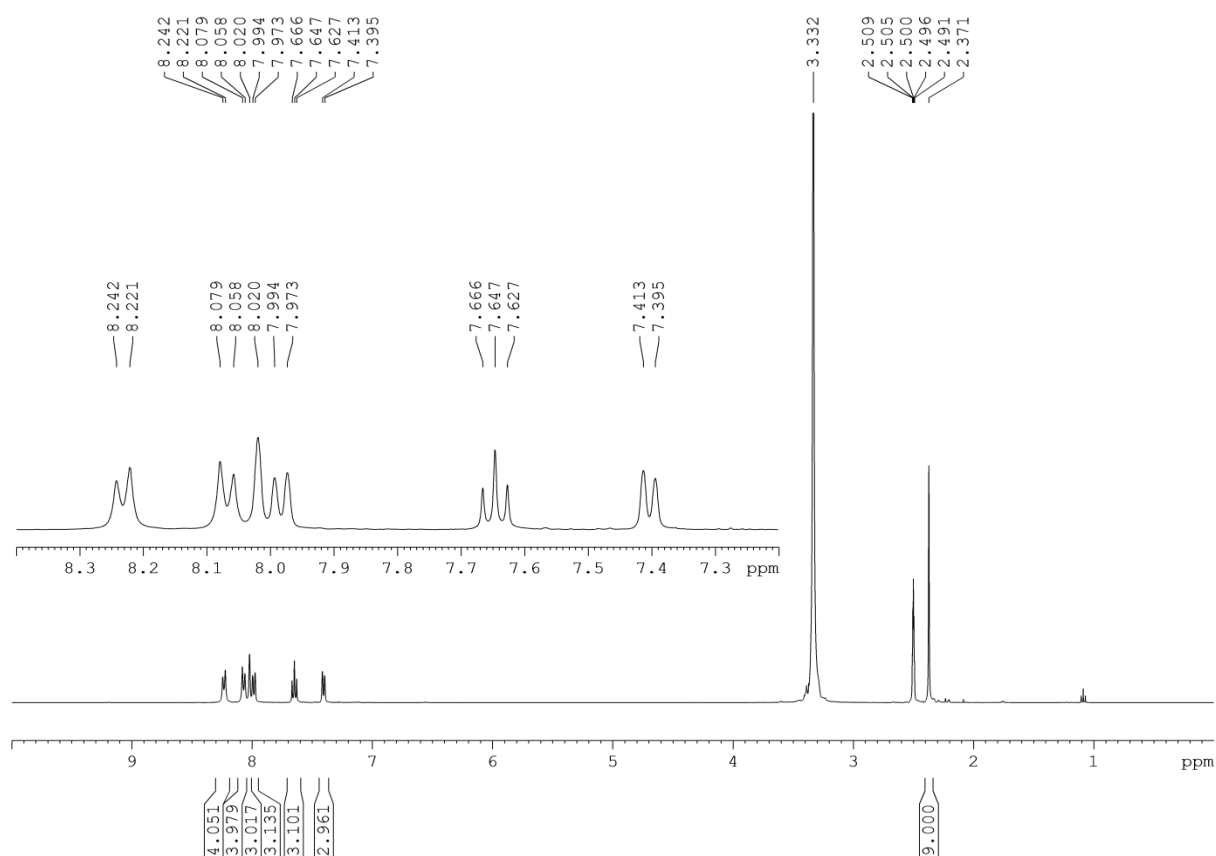

**Figure S8** <sup>1</sup>H NMR of tri-*m*-tolyl-bismuth bis(4-nitrobenzoate), **9** in (CD<sub>3</sub>)<sub>2</sub>SO at 25 °C, 400 MHz.

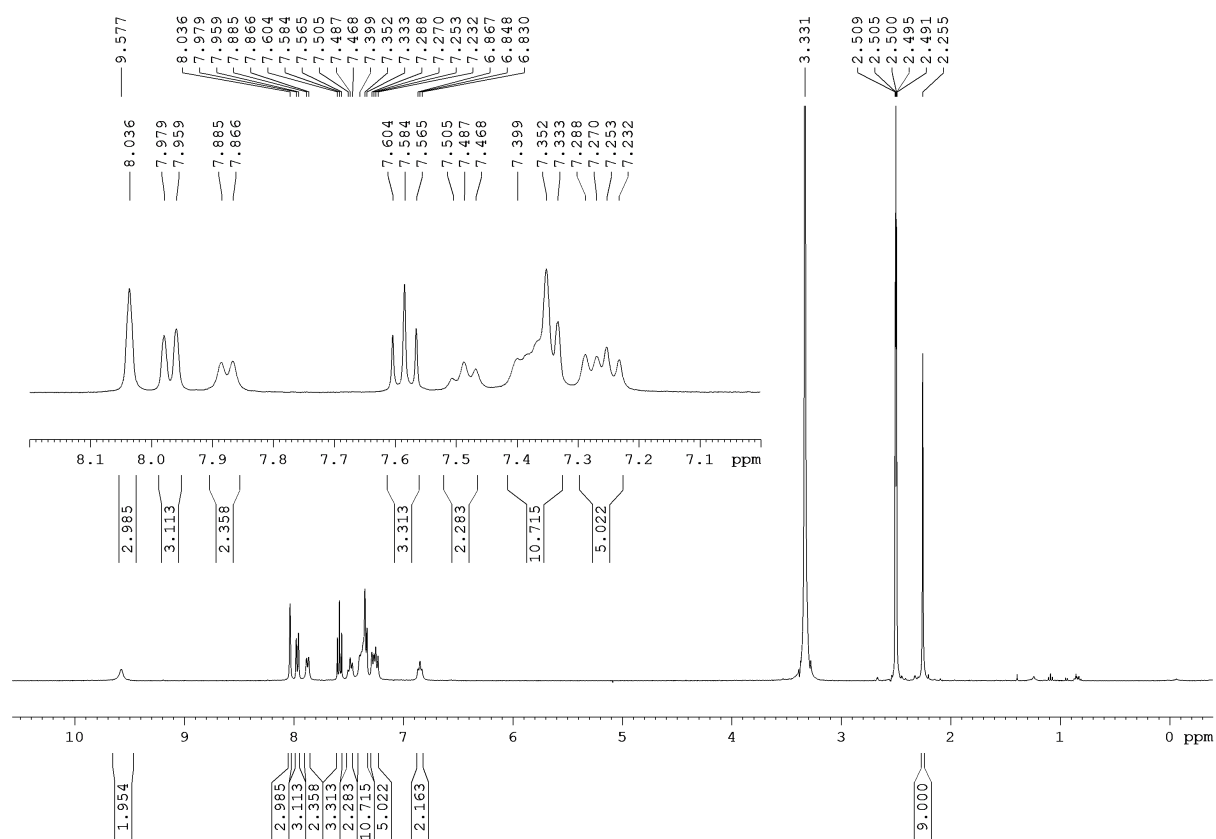

**Figure S9** <sup>1</sup>H NMR of tri-*m*-tolylbismuth bis(2-[[3-trifluoromethyl]phenyl]amino}benzoate), **10** in (CD<sub>3</sub>)<sub>2</sub>SO at 25 °C, 400 MHz.

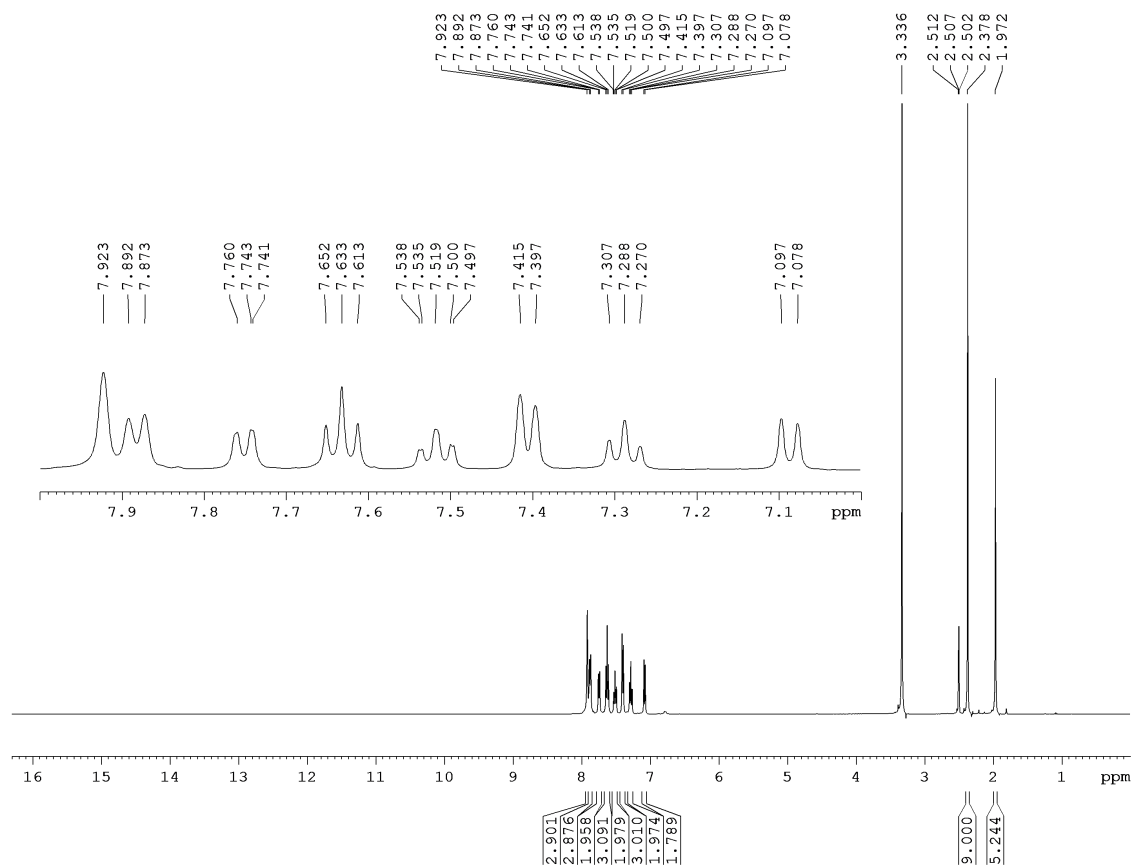

**Figure S10**  $^1\text{H}$  NMR of tri-*m*-tolylbismuth bis(2-(acetoxy)benzoate), **11** in  $(\text{CD}_3)_2\text{SO}$  at 25 °C, 400 MHz

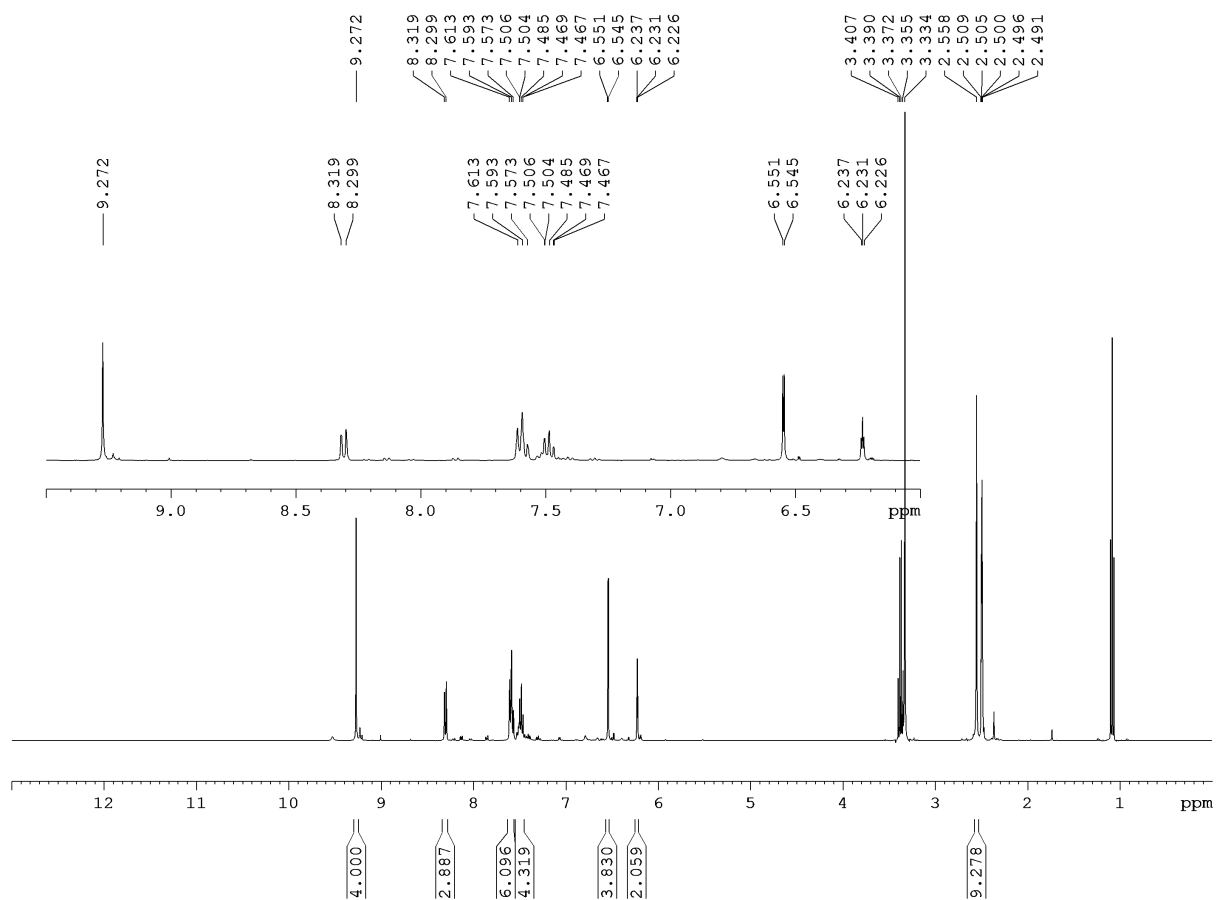

**Figure S11**  $^1\text{H}$  NMR of tri-*o*-tolylbismuth bis(3,5-dimethylbenzoate), **13** in  $\text{CDCl}_3$  at 25 °C, 400 MHz

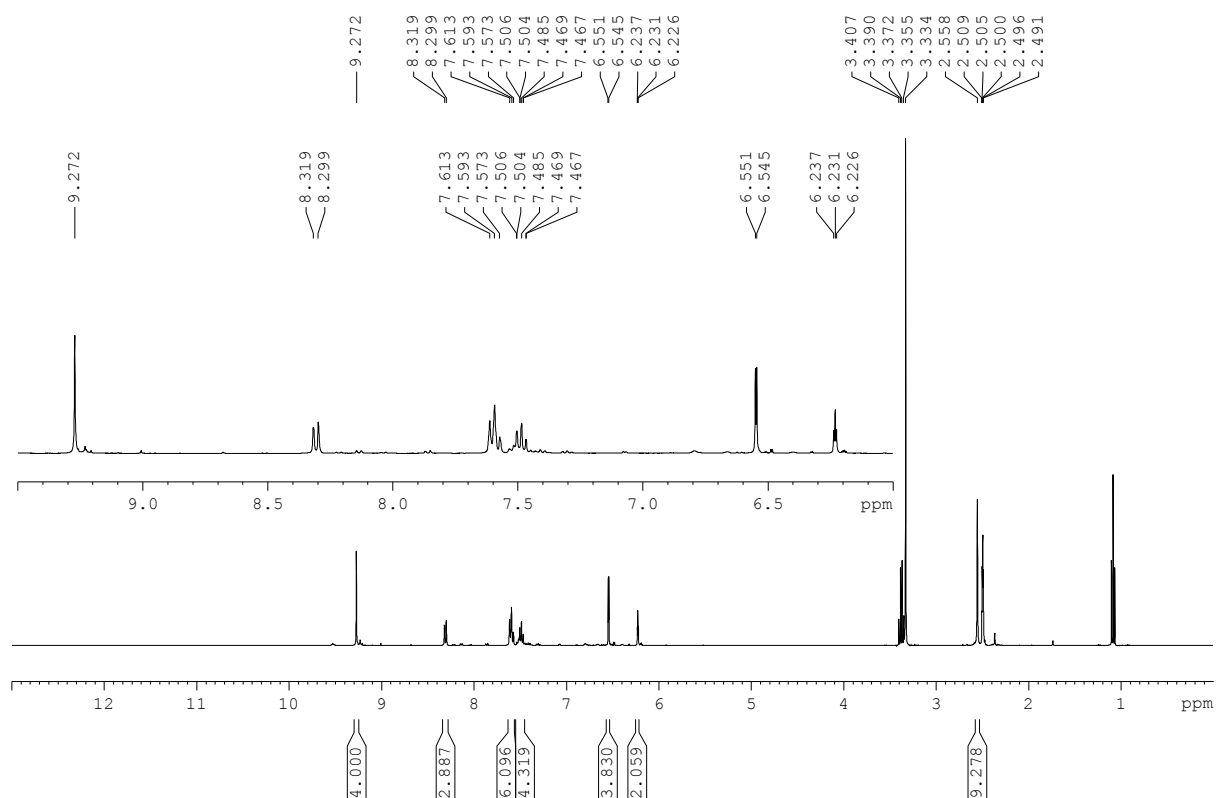

**Figure S12**  $^1\text{H}$  NMR of tri-*o*-tolylbismuth bis(3,5-dihydroxybenzoate), **14** in  $\text{CDCl}_3$  at 25 °C, 400 MHz

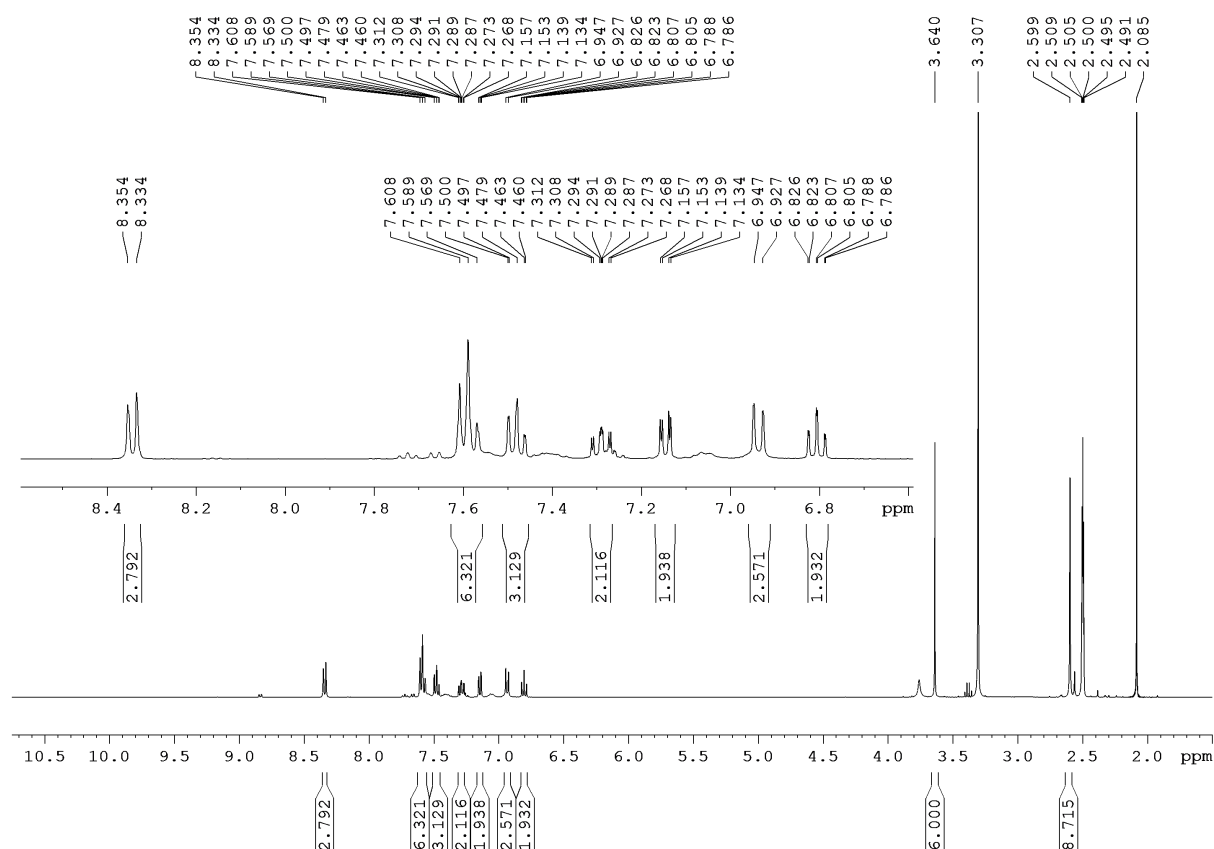

**Figure S13**  $^1\text{H}$  NMR of tri-*o*-tolylbismuth bis(2-methoxybenzoate), **15** in  $(\text{CD}_3)_2\text{SO}$  at 25 °C, 400 MHz

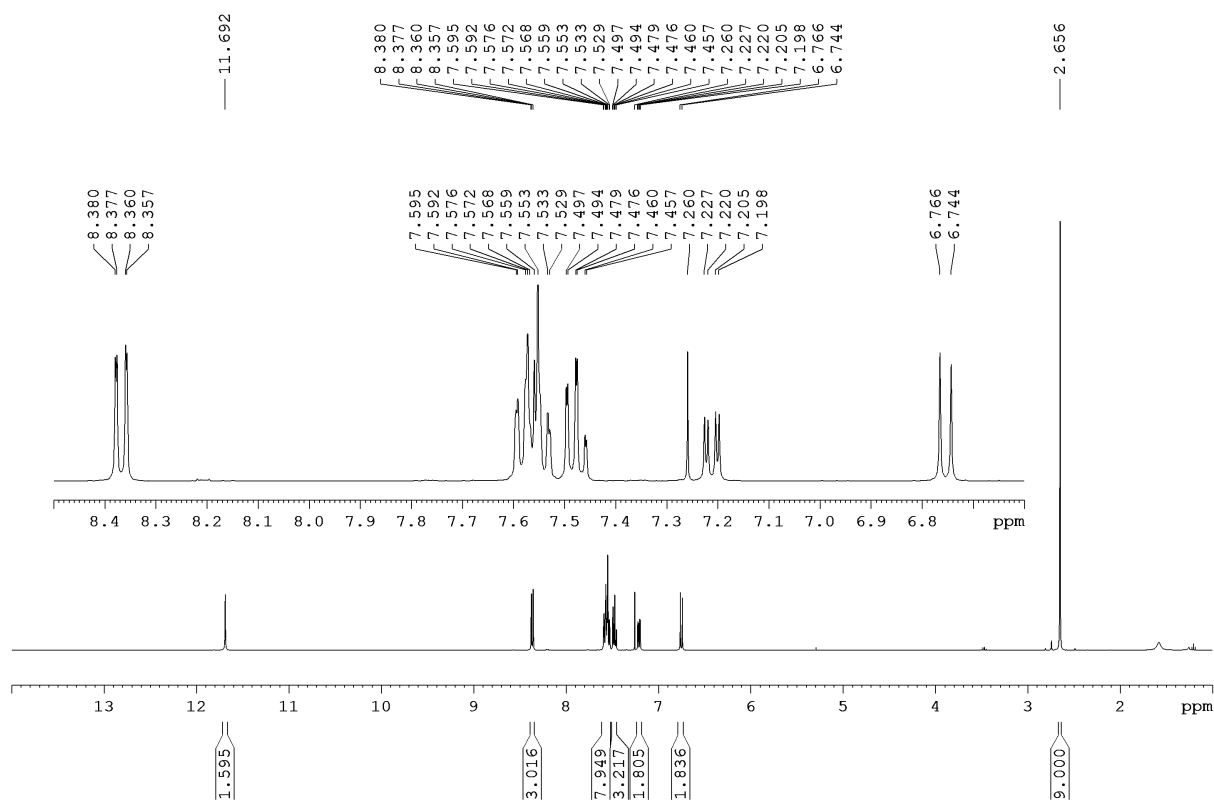

**Figure S14**  $^1\text{H}$  NMR of tri-*o*-tolylbismuth bis(5-chlorosalicylate), **16** in  $\text{CDCl}_3$  at 25 °C, 400 MHz

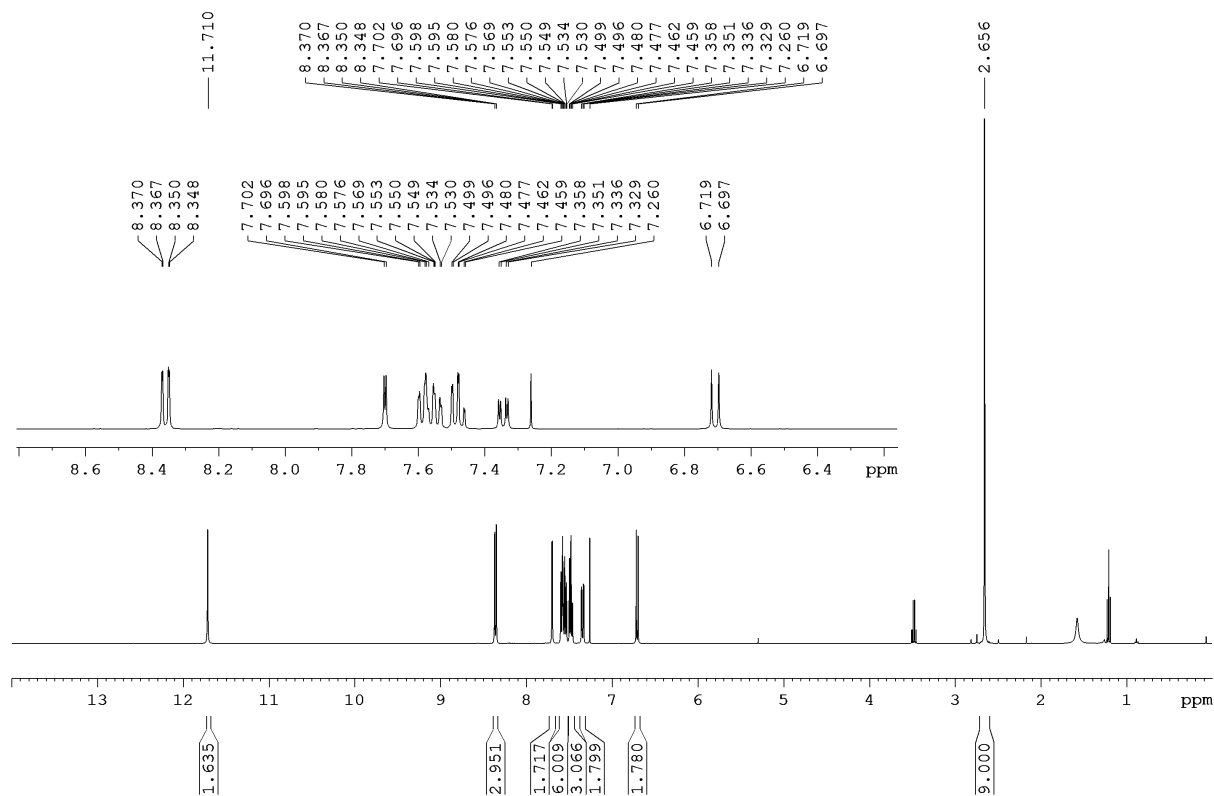

**Figure S15** <sup>1</sup>H NMR of tri-*m*-tolylbismuth bis(5-bromosalicylate), **17** in CDCl<sub>3</sub> at 25 °C, 400 MHz

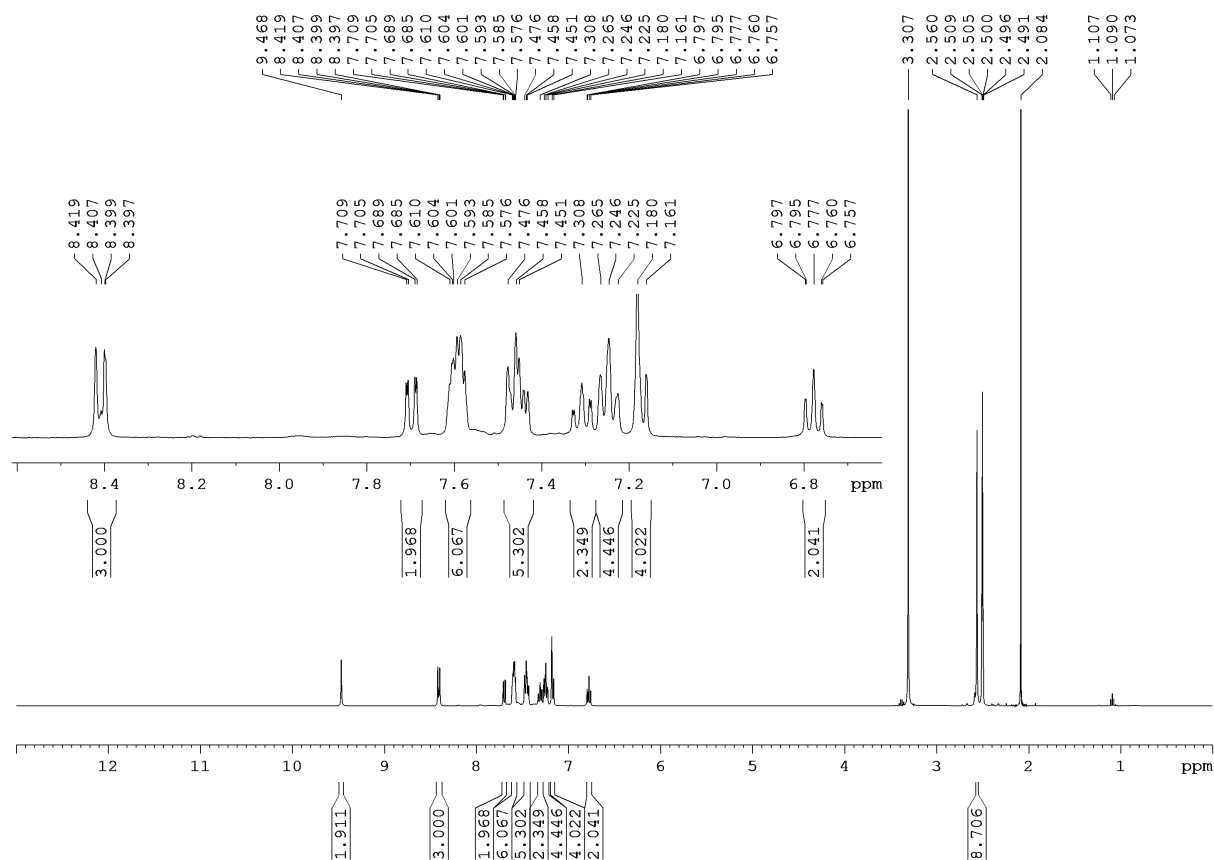

**Figure S16** <sup>1</sup>H NMR of tri-*o*-tolylbismuth bis(2-[(3-(Trifluoromethyl)phenyl)amino]benzoate), **18** in (CD<sub>3</sub>)<sub>2</sub>SO at 25 °C, 400 MHz

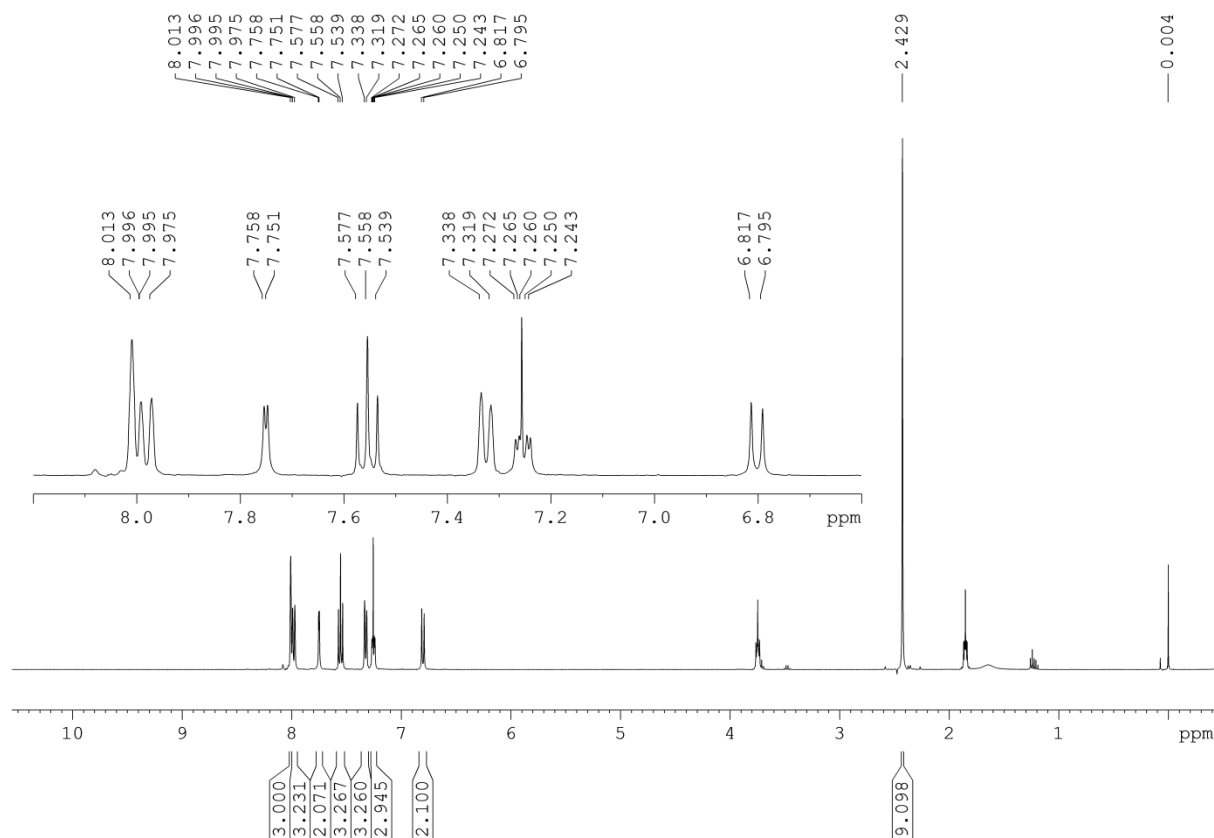

**Figure S17** <sup>1</sup>H NMR of tri-*m*-tolylbismuth bis(5-chlorosalicylate), **19** in CDCl<sub>3</sub> at 25 °C, 400 MHz.

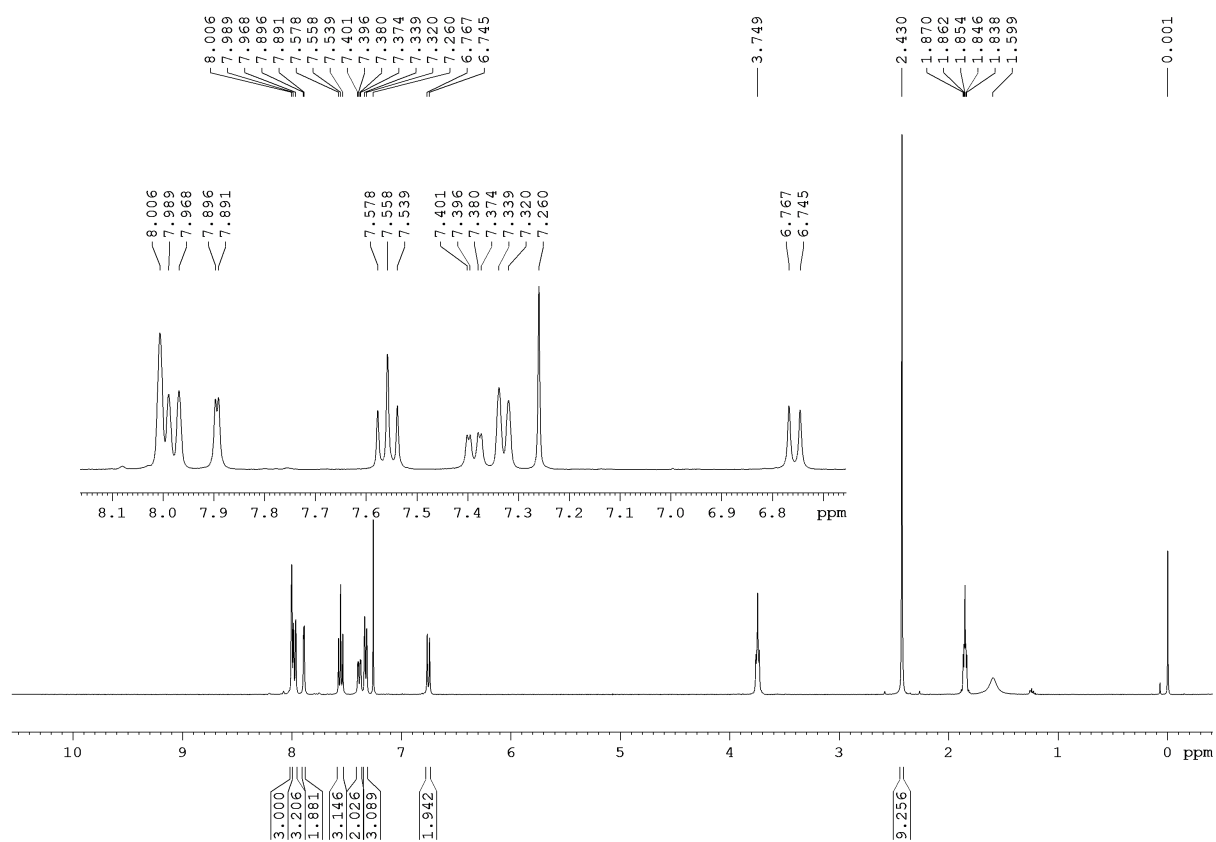

**Figure S18** <sup>1</sup>H NMR of tri-*m*-tolylbismuth bis(5-bromosalicylate), **20** in CDCl<sub>3</sub> at 25 °C, 400 MHz.

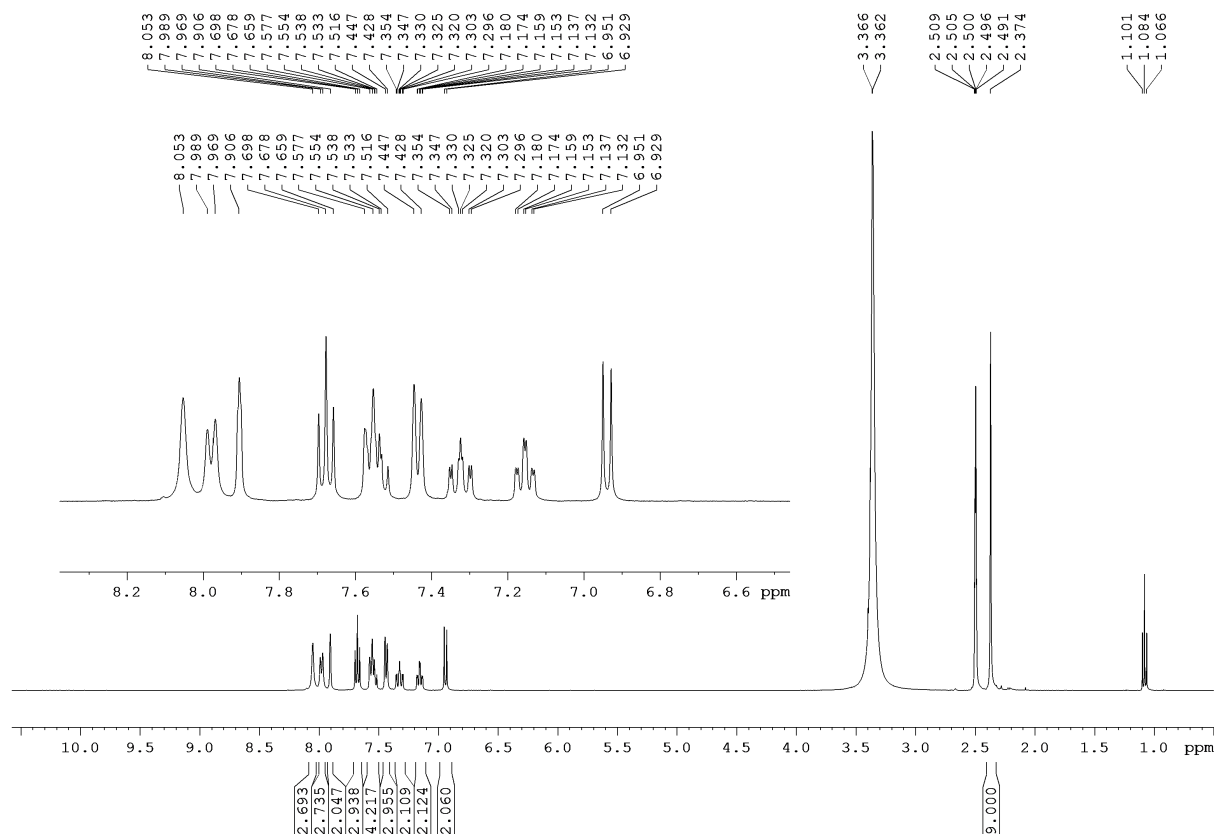

**Figure S19** <sup>1</sup>H NMR of tri-*m*-tolylbismuth bis(2', 4'-difluoro-4-hydroxybiphenyl-3-carboxylate), **21** in (CD<sub>3</sub>)<sub>2</sub>SO at 25 °C, 400 MHz.

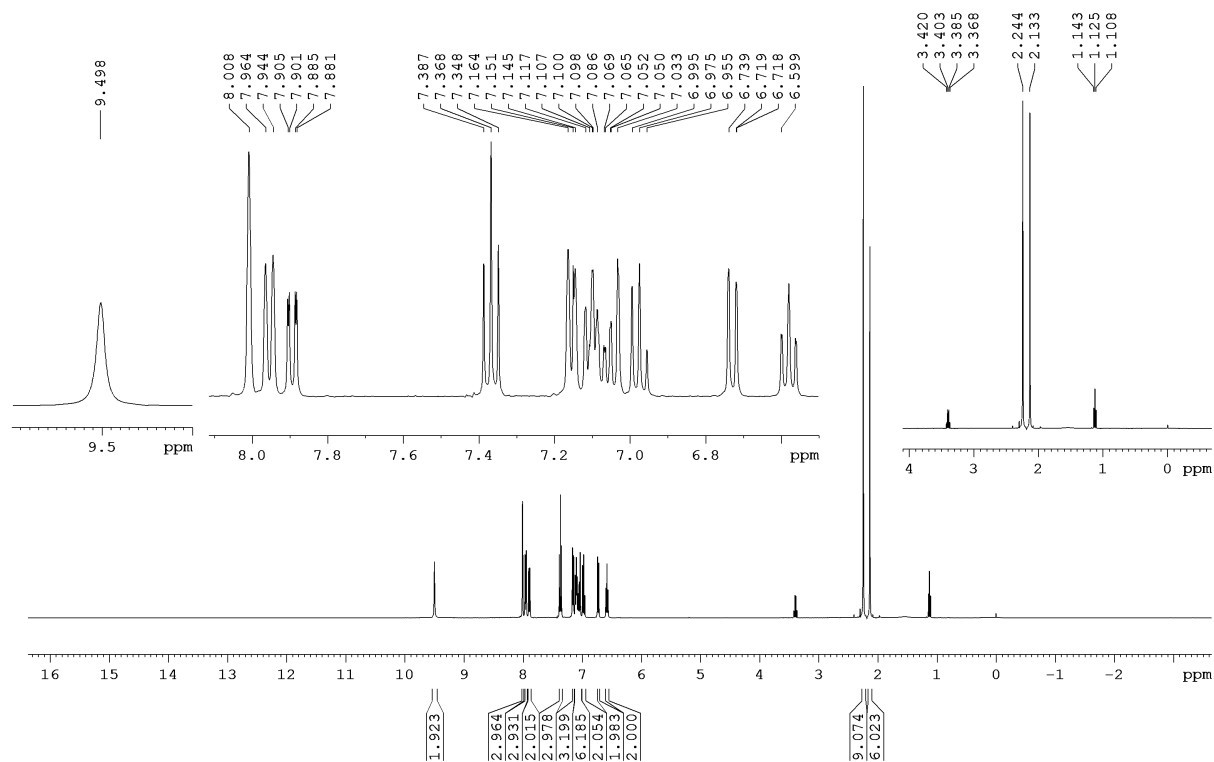

**Figure S20** <sup>1</sup>H NMR of tri-*m*-tolylbismuth bis(2-[(3-chloro-2-methylphenyl)amino]benzoate), **22** in CDCl<sub>3</sub> at 25 °C, 400 MHz

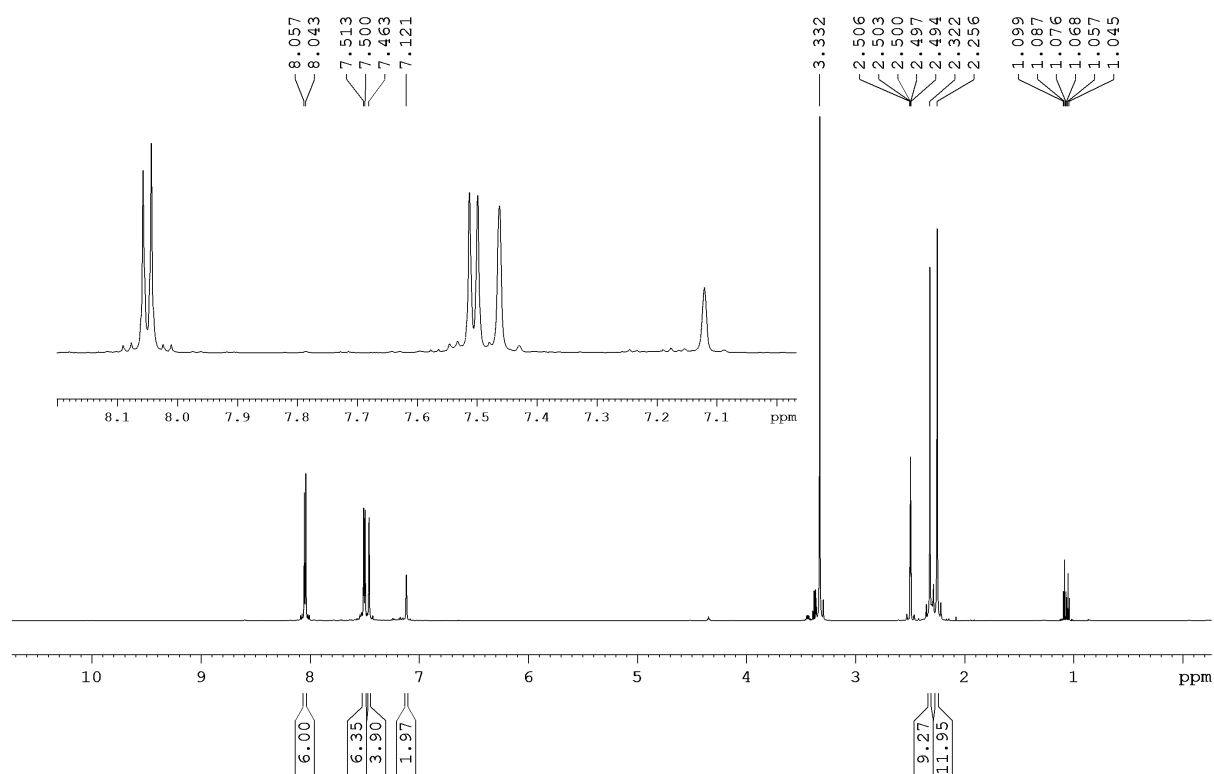

**Figure S21** <sup>1</sup>H NMR of tri-*p*-tolylbismuth bis(3,5-dimethylbenzoate), **23** in (CD<sub>3</sub>)<sub>2</sub>SO at 25 °C, 400 MHz.

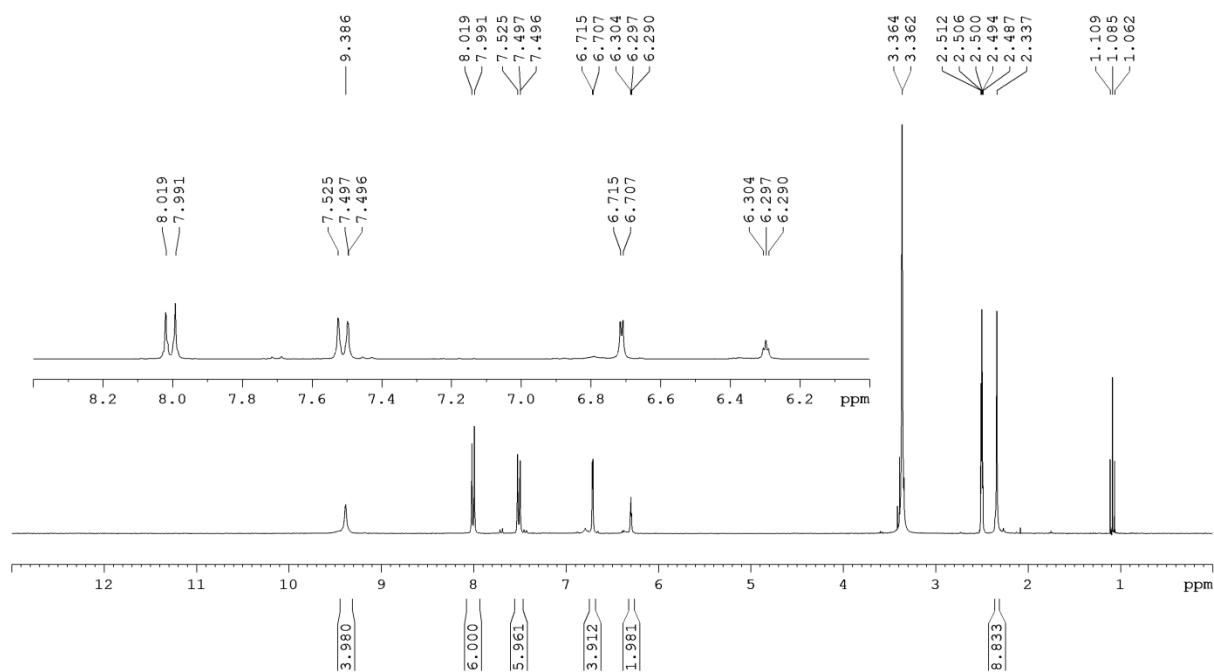

**Figure S22** <sup>1</sup>H NMR of tri-*p*-tolylbismuth bis(3,5-dihydroxybenzoate), **24** in (CD<sub>3</sub>)<sub>2</sub>SO at 25 °C, 400 MHz.

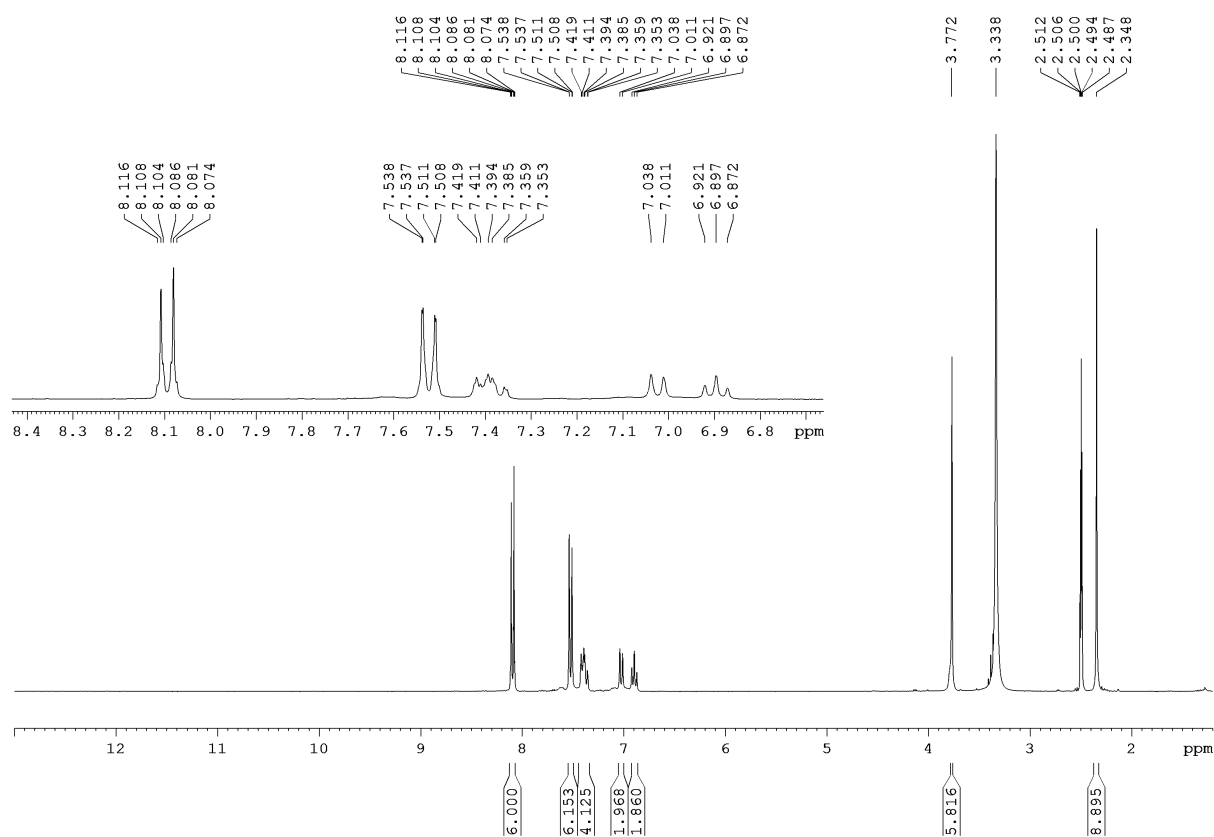

**Figure S23** <sup>1</sup>H NMR of tri-*p*-tolylbismuth bis(2-methoxybenzoate), **25** in (CD<sub>3</sub>)<sub>2</sub>SO at 25 °C, 400 MHz.

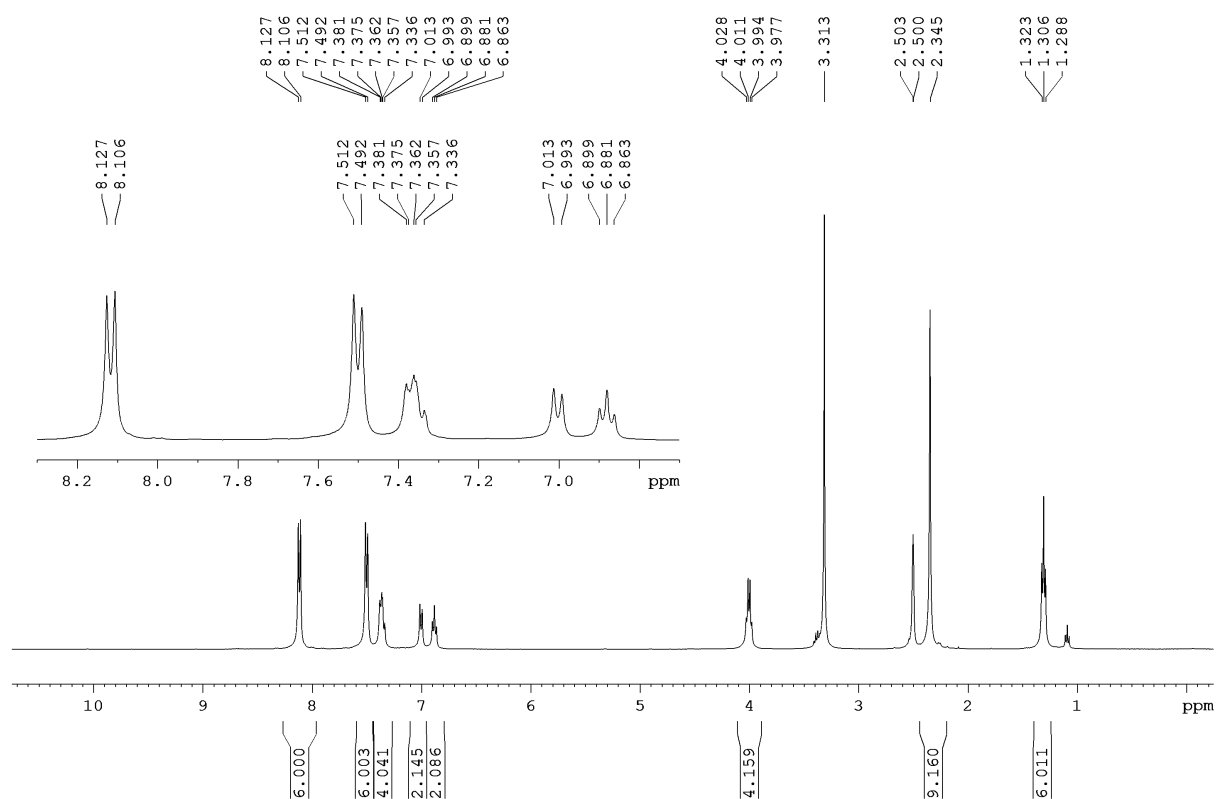

**Figure S24** <sup>1</sup>H NMR of tri-*p*-tolylbismuth bis(2-ethoxybenzoate), **26** in (CD<sub>3</sub>)<sub>2</sub>SO at 25 °C, 400 MHz

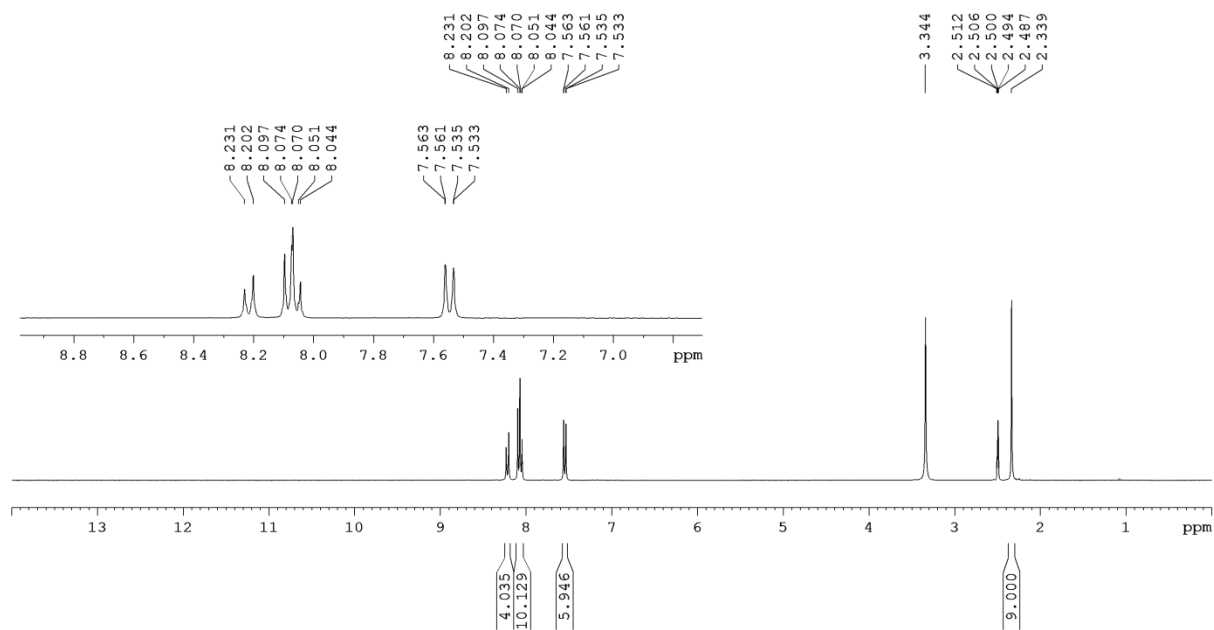

**Figure S25** <sup>1</sup>H NMR of tri-*p*-tolylbismuth bis(4-nitrobenzoate), **27** in (CD<sub>3</sub>)<sub>2</sub>SO at 25 °C, 400 MHz

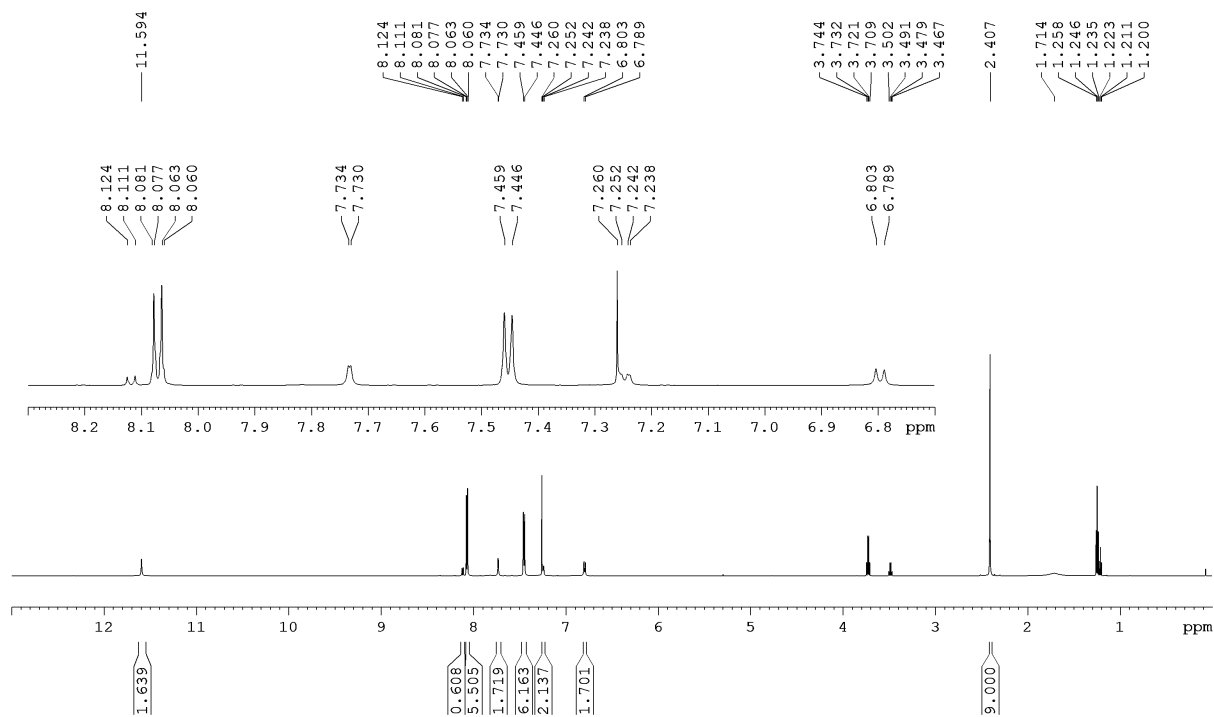

**Figure S26** <sup>1</sup>H NMR of tri-*p*-tolylbismuth bis(5-chlorosalicylate), **28** in CDCl<sub>3</sub> at 25 °C, 400 MHz

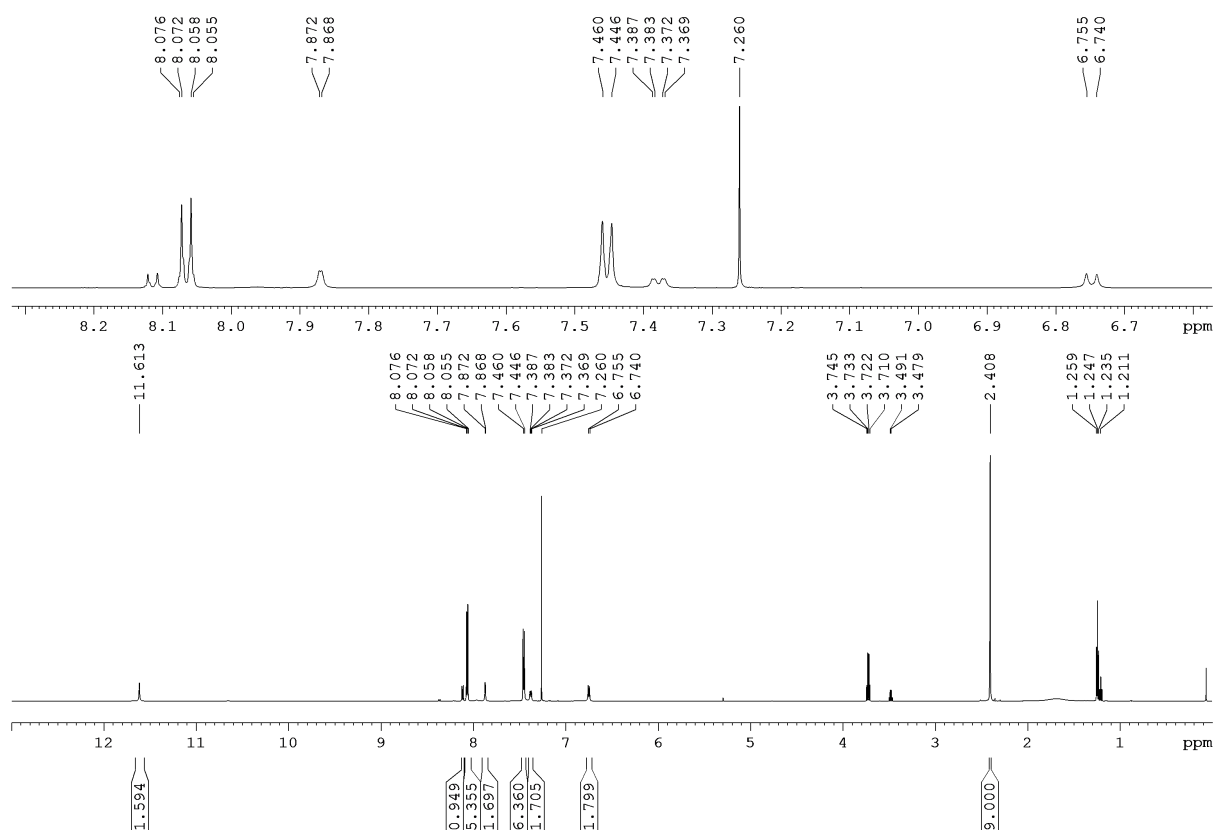

**Figure S27**  $^1\text{H}$  NMR of tri-*p*-tolylbismuth bis(5-bromosalicylate), **29** in  $\text{CDCl}_3$  at 25 °C, 400 MHz

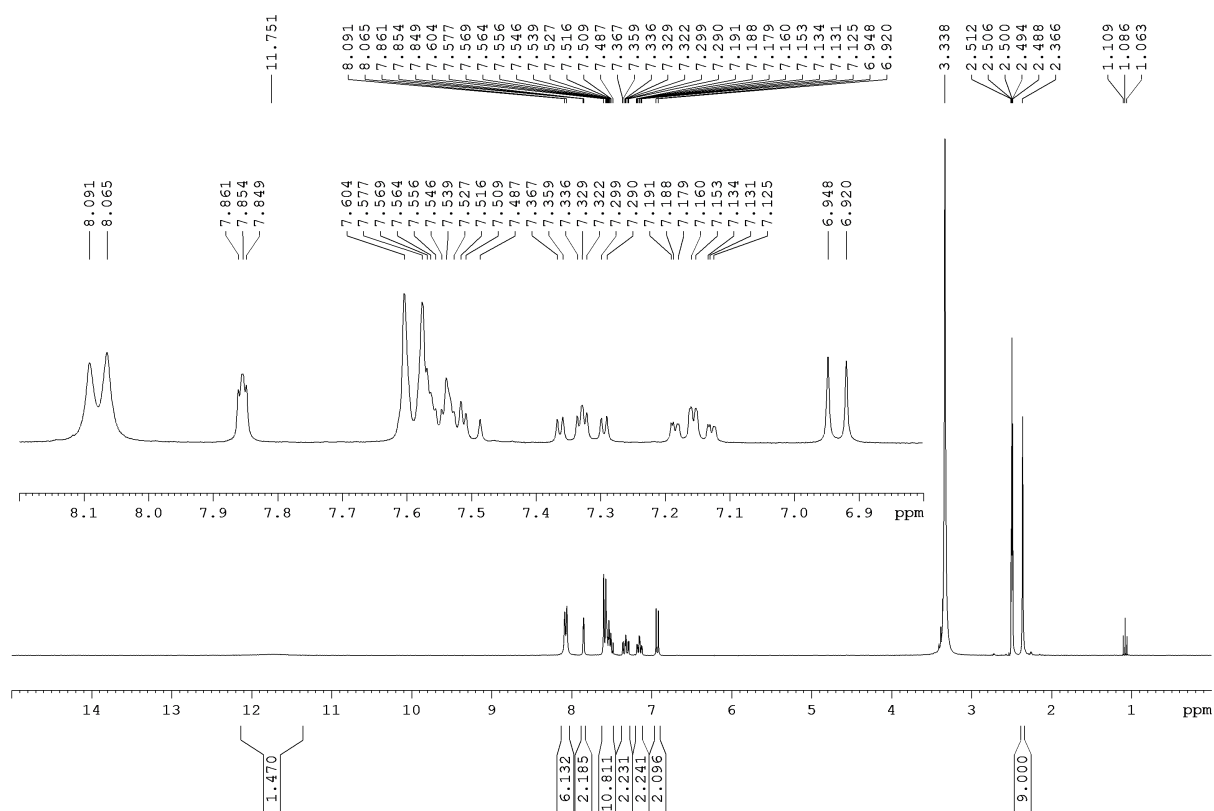

**Figure S28**  $^1\text{H}$  NMR of tri-*p*-tolylbismuth bis(2', 4'-difluoro-4-hydroxybiphenyl-3-carboxylate), **30** in  $\text{CDCl}_3$  at 25 °C, 400 MHz

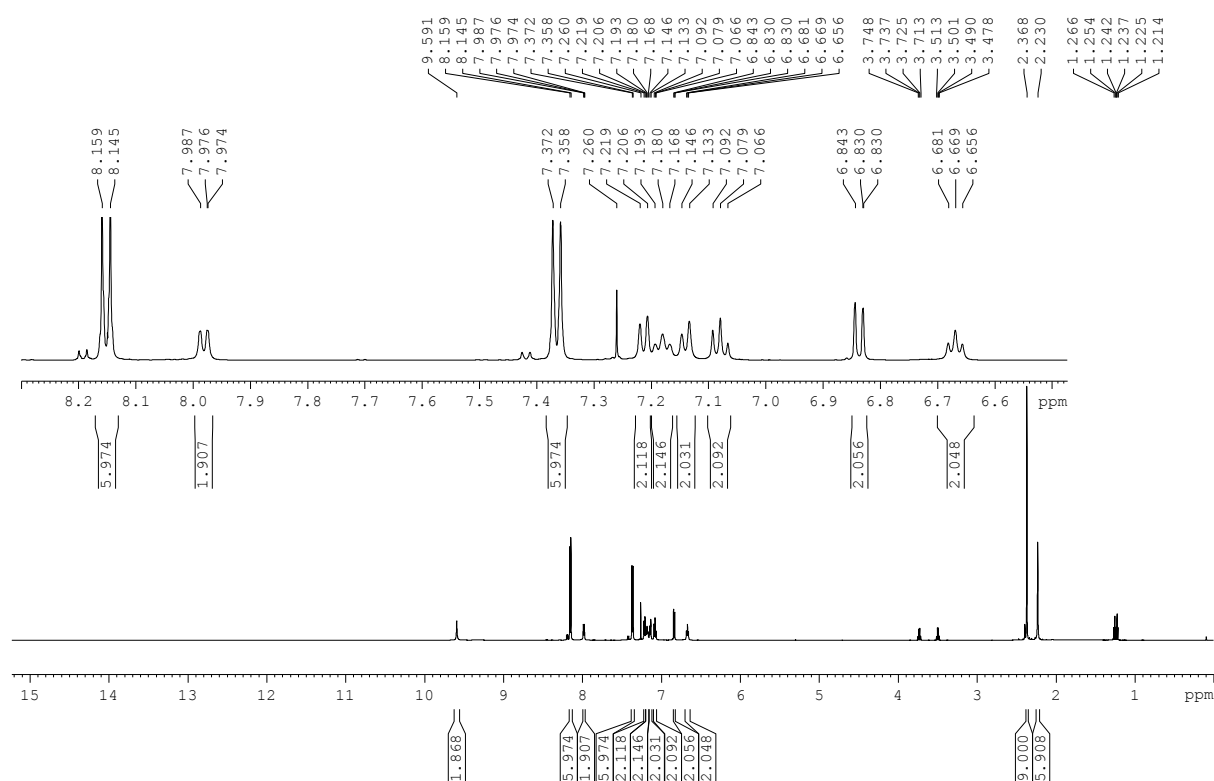

**Figure S29**  $^1\text{H}$  NMR of tri-*p*-tolylbismuth bis(2-[(3-chloro-2-methylphenyl)amino]benzoate), **31** in  $\text{CDCl}_3$  at 25 °C, 400 MHz

### 3. Biological graphs for Compounds 25 – 29 and 32

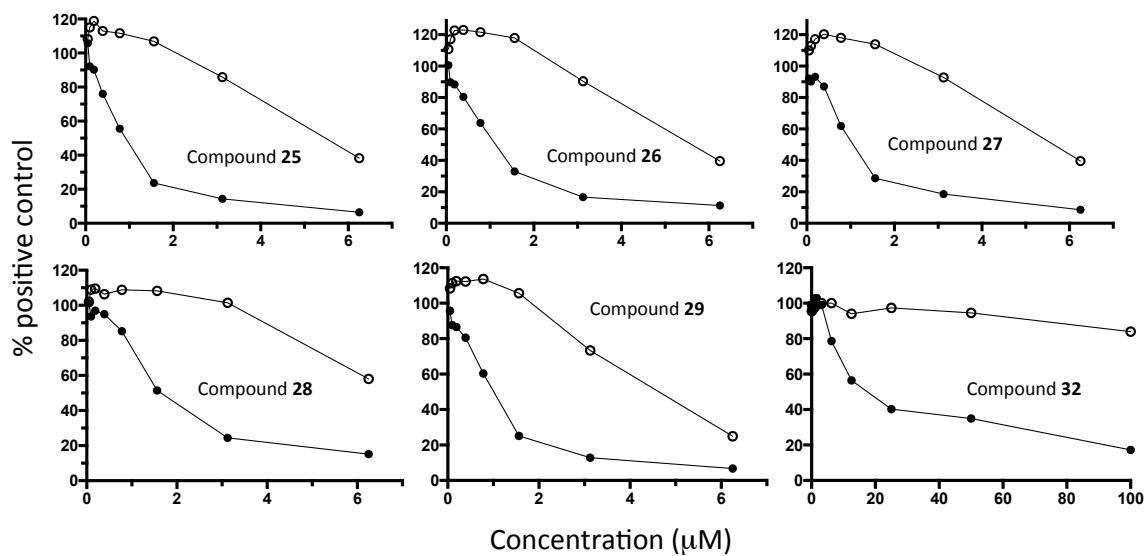

**Figure S30** Activity of 25-29 and 32 on *L. major* promastigotes (●) and human fibroblasts (○) after 48 hours

#### 4. Solid state structures for Compounds 6, 8, 9, 19, 22, 25 – 28 and 31

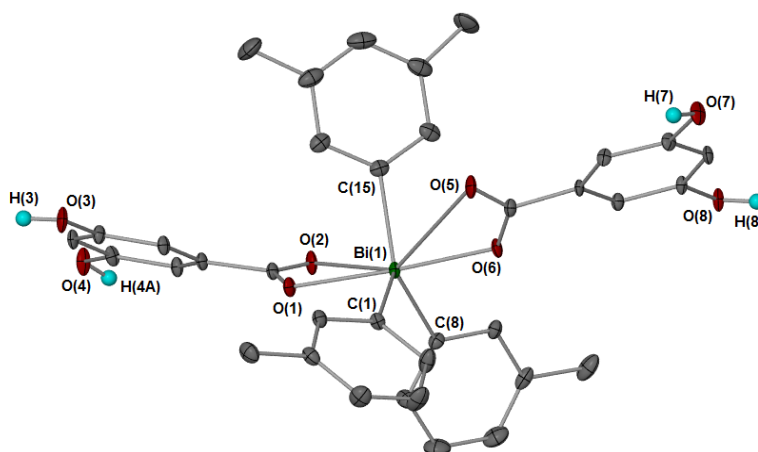

**Figure S31** Molecular structure of [Bi(*m*-Tol)<sub>3</sub>(O<sub>2</sub>CC<sub>6</sub>H<sub>3</sub>(2,5-OH))<sub>2</sub>] **6** showing thermal ellipsoids at 50% probability. Hydrogen atoms have been omitted for clarity. Selected bond lengths (Å): Bi(1)-C(1) 2.186(3); Bi(1)-C(8) 2.191(3); Bi(1)-C(15) 2.202(4); Bi(1)-O(6) 2.247(2); Bi(1)-O(1) 2.267(2); Bi(1)-O(2) 3.071(3); Bi(1)-O(5) 3.262(3).

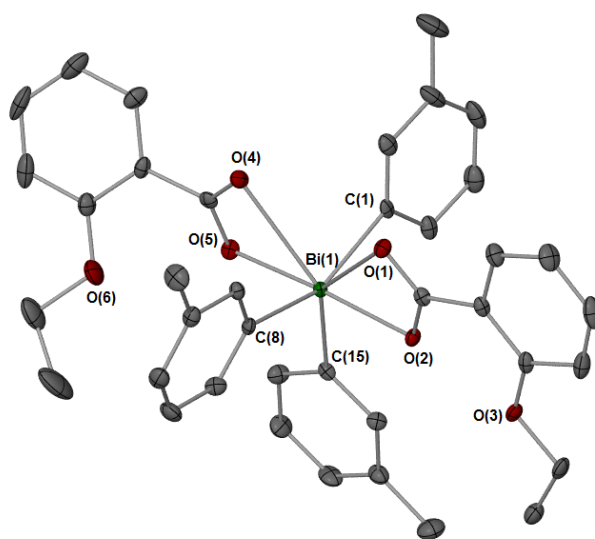

**Figure S32** Molecular structure of [Bi(*m*-Tol)<sub>3</sub>(O<sub>2</sub>CC<sub>6</sub>H<sub>4</sub>(2-EtO))<sub>2</sub>] **8** showing thermal ellipsoids at 50% probability. Hydrogen atoms have been omitted for clarity. Selected bond lengths (Å): Bi(1)-C(1) 2.195(4); Bi(1)-C(8) 2.203(4); Bi(1)-C(15) 2.216(4); Bi(1)-O(5) 2.305(3); Bi(1)-O(2) 2.309(3); Bi(1)-O(1) 2.686(3); Bi(1)-O(4) 2.743(3).

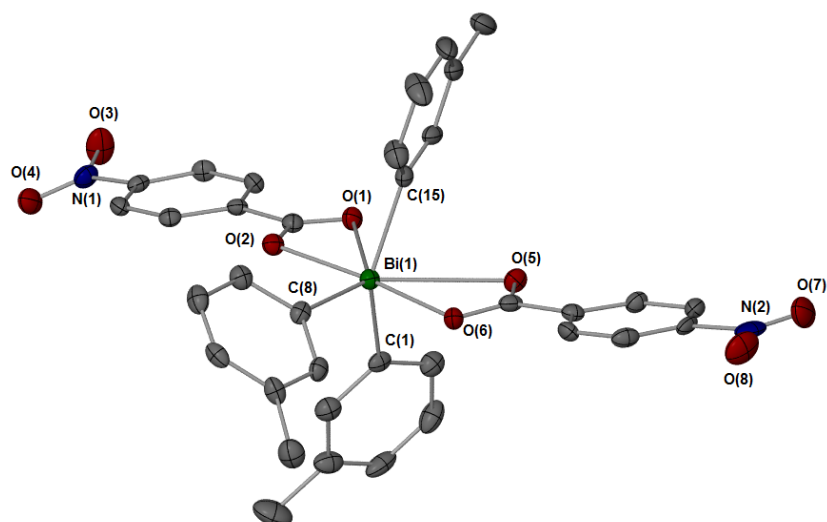

**Figure S33** Molecular structure of  $[\text{Bi}(m\text{-Tol})_3(\text{O}_2\text{CC}_6\text{H}_4(4\text{-NO}_2))_2]$  **9** showing thermal ellipsoids at 50% probability. Hydrogen atoms have been omitted for clarity. Selected bond lengths (Å): Bi(1)-C(15) 2.182(4); Bi(1)-C(1) 2.195(4); Bi(1)-C(8) 2.205(7); Bi(1)-O(6) 2.274(4); Bi(1)-O(2) 2.287(3); Bi(1)-O(1) 2.841(2); Bi(1)-O(5) 2.899(3).

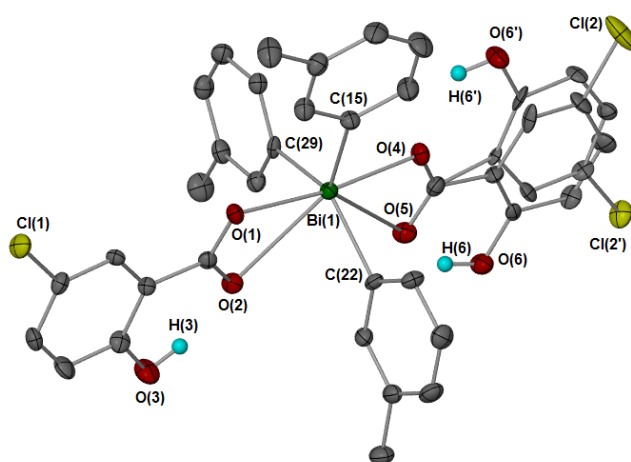

**Figure S34** Molecular structure of  $[\text{Bi}(m\text{-Tol})_3(\text{O}_2\text{CC}_6\text{H}_3(2\text{-OH},5\text{-Cl}))_2]$  **19** showing thermal ellipsoids at 50% probability. Hydrogen atoms have been omitted for clarity. Selected bond lengths (Å): Bi(1)-C(29) 2.176(4); Bi(1)-C(22) 2.189(4); Bi(1)-C(15) 2.224(5); Bi(1)-O(4) 2.280(3); Bi(1)-O(1) 2.318(3); Bi(1)-O(2) 2.849(3); Bi(1)-O(5) 3.047(3).

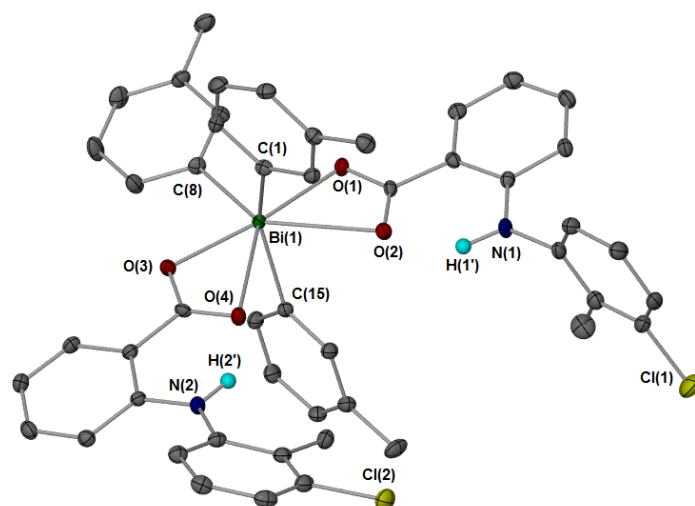

**Figure S35** Molecular structure of  $[\text{Bi}(m\text{-Tol})_3(\text{O}_2\text{CC}_6\text{H}_4(2\text{-NHC}_6\text{H}_3(2\text{-Me},3\text{-Cl})))_2]$  **22** showing thermal ellipsoids at 50% probability. Hydrogen atoms have been omitted for clarity. Selected bond lengths (Å): Bi(1)-C(15) 2.200(4); Bi(1)-C(1) 2.201(4); Bi(1)-C(8) 2.238(5); Bi(1)-O(3) 2.270(3); Bi(1)-O(1) 2.313(3); Bi(1)-O(2) 2.706(3); Bi(1)-O(4) 2.835(3).

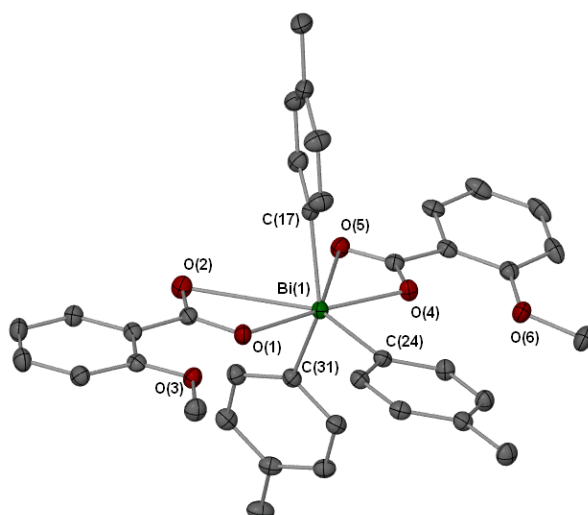

**Figure S36** Molecular structure of  $[\text{Bi}(p\text{-Tol})_3(\text{O}_2\text{CC}_6\text{H}_4(2\text{-OMe})))_2]$  **25** showing thermal ellipsoids at 50% probability. Hydrogen atoms have been omitted for clarity. Selected bond lengths (Å): Bi(1)-C(31) 2.186(4); Bi(1)-C(17) 2.195(3); Bi(1)-C(24) 2.205(3); Bi(1)-O(1) 2.249(2); Bi(1)-O(4) 2.257(2); Bi(1)-O(5) 2.905(3); Bi(1)-O(2) 2.983(3).

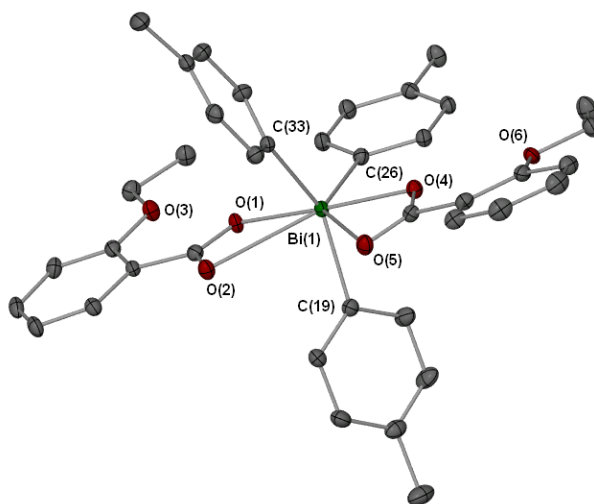

**Figure S37** Molecular structure of  $[\text{Bi}(p\text{-Tol})_3(\text{O}_2\text{CC}_6\text{H}_4(2\text{-OEt}))_2]$  **26** showing thermal ellipsoids at 50% probability. Hydrogen atoms have been omitted for clarity. Selected bond lengths (Å): Bi(1)-C(33) 2.193(3); Bi(1)-C(19) 2.195(3); Bi(1)-C(26) 2.207(3); Bi(1)-O(4) 2.276(2); Bi(1)-O(1) 2.278(2); Bi(1)-O(2) 2.820(2); Bi(1)-O(5) 2.857(2).

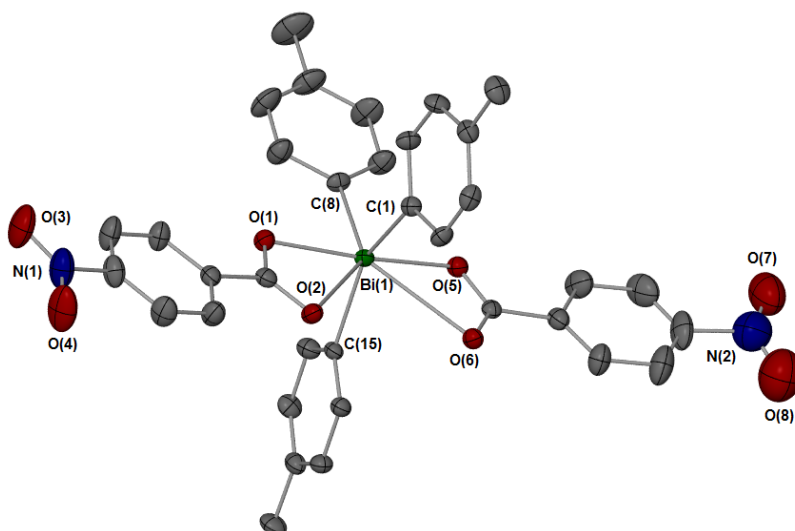

**Figure S38** Molecular structure of  $[\text{Bi}(p\text{-Tol})_3(\text{O}_2\text{CC}_6\text{H}_4(4\text{-NO}_2))_2]$  **27** showing thermal ellipsoids at 50% probability. Hydrogen atoms have been omitted for clarity. Selected bond lengths (Å): Bi(1)-C(15) 2.186(5); Bi(1)-C(1) 2.190(5); Bi(1)-C(8) 2.212(5); Bi(1)-O(5) 2.256(3); Bi(1)-O(1) 2.338(3); Bi(1)-O(2) 2.727(4); Bi(1)-O(6) 2.869(4).

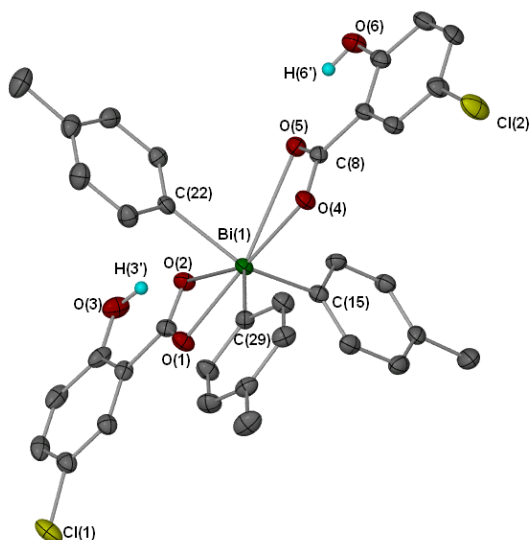

**Figure S39** Molecular structure of  $[\text{Bi}(p\text{-Tol})_3(\text{O}_2\text{CC}_6\text{H}_3(2\text{-OH},5\text{-Cl}))_2]$  **28** showing thermal ellipsoids at 50% probability. Hydrogen atoms have been omitted for clarity. Selected bond lengths (Å): Bi(1)-C(15) 2.174(4); Bi(1)-C(22) 2.192(4); Bi(1)-C(29) 2.204(4); Bi(1)-O(4) 2.265(3); Bi(1)-O(1) 2.289(3); Bi(1)-O(2) 2.951(4); Bi(1)-O(5), 3.001(3).

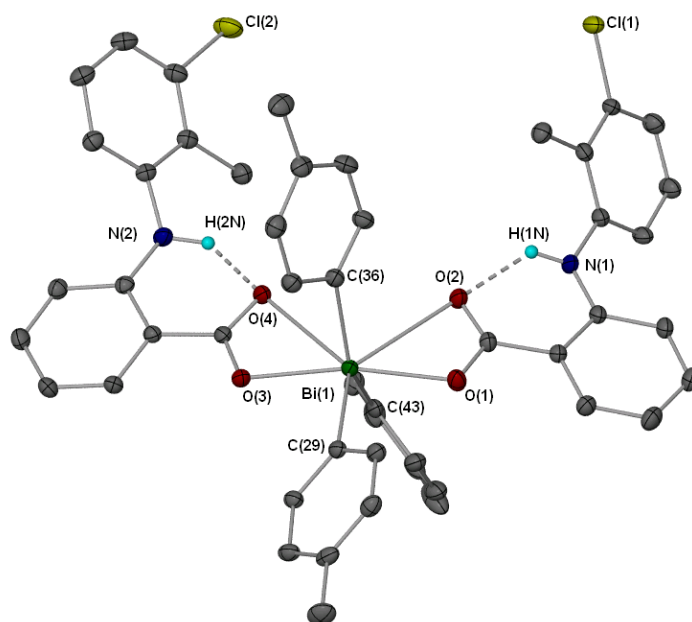

**Figure S40** Molecular structure of  $[\text{Bi}(p\text{-Tol})_3(\text{O}_2\text{CC}_6\text{H}_4(2\text{-NHC}_6\text{H}_3(2\text{-Me},3\text{-Cl}))_2]$  **31** showing thermal ellipsoids at 50% probability. Hydrogen atoms have been omitted for clarity. Selected bond lengths (Å): Bi(1)-C(29) 2.192(3); Bi(1)-C(36) 2.193(3); Bi(1)-C(43) 2.198(3); Bi(1)-O(1) 2.281(2); Bi(1)-O(3) 2.282(2); Bi(1)-O(2) 2.816(2); Bi(1)-O(4) 2.905(2).

5. Crystallographic summary of **6**, **8**, **9**, **19**, **22**, **25** – **28** and **31**

**Table S1** Summary of crystallographic data for Compound **6**, **8**, **9**, **19**, **22**, **25** – **28**, **31** (<sup>a</sup> $I > 2\sigma(I)$ ); <sup>b</sup> all data).

| Compound                                                      | <b>6</b>                                          | <b>8</b>                                         | <b>9</b>                                                        | <b>19</b>                                                        | <b>22</b>                                                                       | <b>25</b>                                        | <b>26</b>                                        | <b>27</b>                                                       | <b>28</b>                                                        | <b>31</b>                                                                       |
|---------------------------------------------------------------|---------------------------------------------------|--------------------------------------------------|-----------------------------------------------------------------|------------------------------------------------------------------|---------------------------------------------------------------------------------|--------------------------------------------------|--------------------------------------------------|-----------------------------------------------------------------|------------------------------------------------------------------|---------------------------------------------------------------------------------|
| Chemical formula                                              | C <sub>39</sub> H <sub>45</sub> BiO <sub>11</sub> | C <sub>39</sub> H <sub>39</sub> BiO <sub>6</sub> | C <sub>35</sub> H <sub>29</sub> BiN <sub>2</sub> O <sub>8</sub> | C <sub>35</sub> H <sub>29</sub> BiCl <sub>2</sub> O <sub>6</sub> | C <sub>49</sub> H <sub>43</sub> BiCl <sub>2</sub> N <sub>2</sub> O <sub>4</sub> | C <sub>37</sub> H <sub>35</sub> BiO <sub>6</sub> | C <sub>39</sub> H <sub>39</sub> BiO <sub>6</sub> | C <sub>39</sub> H <sub>37</sub> BiN <sub>2</sub> O <sub>9</sub> | C <sub>35</sub> H <sub>29</sub> BiCl <sub>2</sub> O <sub>6</sub> | C <sub>49</sub> H <sub>43</sub> BiCl <sub>2</sub> N <sub>2</sub> O <sub>4</sub> |
| Formula Mass                                                  | 898.73                                            | 812.68                                           | 814.58                                                          | 825.46                                                           | 35459                                                                           | 784.63                                           | 812.68                                           | 886.69                                                          | 825.46                                                           | 1003.73                                                                         |
| Crystal system                                                | Orthorhombic                                      | Orthorhombic                                     | Monoclinic                                                      | Triclinic                                                        | Triclinic                                                                       | Monoclinic                                       | Monoclinic                                       | Monoclinic                                                      | Triclinic                                                        | Orthorhombic                                                                    |
| <i>a</i> /Å                                                   | 15.636(3)                                         | 9.1878(4)                                        | 17.8158(13)                                                     | 9.0562(4)                                                        | 9.0480(18)                                                                      | 10.960(2)                                        | 10.949(2)                                        | 10.5176(3)                                                      | 9.1030(18)                                                       | 20.797(4)                                                                       |
| <i>b</i> /Å                                                   | 15.607(3)                                         | 18.7150(10)                                      | 14.7358(6)                                                      | 11.5012(5)                                                       | 11.217(2)                                                                       | 15.975(3)                                        | 15.980(3)                                        | 27.1933(8)                                                      | 10.781(2)                                                        | 15.314(3)                                                                       |
| <i>c</i> /Å                                                   | 30.709(6)                                         | 19.9856(10)                                      | 15.0730(10)                                                     | 16.2432(7)                                                       | 20.912(4)                                                                       | 17.886(4)                                        | 18.978(4)                                        | 14.2016(5)                                                      | 18.399(4)                                                        | 26.182(5)                                                                       |
| $\alpha$ /°                                                   | 90                                                | 90                                               | 90                                                              | 107.263(4)                                                       | 101.82(3)                                                                       | 90                                               | 90                                               | 90                                                              | 98.62(3)                                                         | 90                                                                              |
| $\beta$ /°                                                    | 90                                                | 90                                               | 125.227(10)                                                     | 90.519(4)                                                        | 90.76(3)                                                                        | 91.79(3)                                         | 93.65(3)                                         | 102.235(2)                                                      | 96.46(3)                                                         | 90                                                                              |
| $\gamma$ /°                                                   | 90                                                | 90                                               | 90                                                              | 99.342(4)                                                        | 90.17(3)                                                                        | 90                                               | 90                                               | 90                                                              | 113.48(3)                                                        | 90                                                                              |
| <i>V</i> /Å <sup>3</sup>                                      | 7494(3)                                           | 3436.5(3)                                        | 3232.5(3)                                                       | 1591.26(12)                                                      | 2077.2(7)                                                                       | 3130.1(11)                                       | 3313.7(12)                                       | 3969.5(2)                                                       | 1607.7(6)                                                        | 8339(3)                                                                         |
| Space group                                                   | <i>Pbca</i>                                       | <i>P2<sub>1</sub>2<sub>1</sub>2<sub>1</sub></i>  | <i>C2</i>                                                       | <i>P-1</i>                                                       | <i>P-1</i>                                                                      | <i>P2<sub>1</sub>/c</i>                          | <i>P-1</i>                                       | <i>P2<sub>1</sub>/c</i>                                         | <i>P-1</i>                                                       | <i>Pbca</i>                                                                     |
| <i>Z</i>                                                      | 8                                                 | 4                                                | 4                                                               | 2                                                                | 2                                                                               | 4                                                | 4                                                | 4                                                               | 2                                                                | 8                                                                               |
| Reflections collected                                         | 123455                                            | 20817                                            | 15330                                                           | 24451                                                            | 35459                                                                           | 58996                                            | 61780                                            | 27244                                                           | 30394                                                            | 184688                                                                          |
| Ind. reflns                                                   | 8933                                              | 10969                                            | 7286                                                            | 7585                                                             | 9060                                                                            | 7976                                             | 9449                                             | 9783                                                            | 7821                                                             | 14783                                                                           |
| <i>R</i> <sub>int</sub>                                       | 0.0617                                            | 0.0421                                           | 0.0342                                                          | 0.0637                                                           | 0.0411                                                                          | 0.0476                                           | 0.0451                                           | 0.0411                                                          | 0.0405                                                           | 0.0917                                                                          |
| Final <i>R</i> <sub>1</sub> values <sup>a</sup>               | 0.0331                                            | 0.0373                                           | 0.0281                                                          | 0.0400                                                           | 0.0398                                                                          | 0.0353                                           | 0.0316                                           | 0.0418                                                          | 0.0350                                                           | 0.0402                                                                          |
| Final <i>wR</i> ( <i>F</i> <sup>2</sup> ) values <sup>a</sup> | 0.0846                                            | 0.0639                                           | 0.0417                                                          | 0.0672                                                           | 0.1003                                                                          | 0.0891                                           | 0.0853                                           | 0.0961                                                          | 0.0905                                                           | 0.1085                                                                          |
| Final <i>R</i> <sub>1</sub> values <sup>b</sup>               | 0.0353                                            | 0.0482                                           | 0.0356                                                          | 0.0625                                                           | 0.0443                                                                          | 0.0433                                           | 0.0348                                           | 0.0606                                                          | 0.0367                                                           | 0.0470                                                                          |
| Final <i>wR</i> ( <i>F</i> <sup>2</sup> ) values <sup>b</sup> | 0.0858                                            | 0.0685                                           | 0.0444                                                          | 0.0769                                                           | 0.1027                                                                          | 0.0943                                           | 0.0876                                           | 0.1029                                                          | 0.0920                                                           | 0.1131                                                                          |
| GoF                                                           | 1.150                                             | 1.023                                            | 0.910                                                           | 1.037                                                            | 1.091                                                                           | 1.038                                            | 0.966                                            | 1.061                                                           | 1.082                                                            | 1.041                                                                           |
| Temperature (K)                                               | 173(2)                                            | 123(2)                                           | 123(2)                                                          | 123(2)                                                           | 173(2)                                                                          | 173(2)                                           | 173(2)                                           | 123(2)                                                          | 173(2)                                                           | 100(2)                                                                          |
